## 1 Title

2 Type I IFN promotes pathogenic inflammatory monocyte maturation during H5N1 infection

3  
4 Slim Fourati<sup>1</sup>, David Jimenez-Morales<sup>2</sup>, Judd Hultquist<sup>3</sup>, Max W. Chang<sup>4</sup>, Christopher Benner<sup>4</sup>, Nevan  
5 Krogan<sup>5,6,7</sup>, Lars Pache<sup>8</sup>, Sumit Chanda<sup>8</sup>, Rafick-Pierre Sekaly<sup>1</sup>, Adolfo García-Sastre<sup>9,10,11,12</sup> and Melissa  
6 B. Uccellini<sup>9,11,13</sup>

7  
8 <sup>1</sup>Emory University School of Medicine, Atlanta, GA

9 <sup>2</sup>Department of Medicine, Division of Cardiovascular Medicine, Stanford University, Stanford, CA

10 <sup>3</sup>Division of Infectious Diseases, Northwestern University Feinberg School of Medicine, Chicago, IL

11 <sup>4</sup>Department of Medicine, University of California San Diego, La Jolla CA

12 <sup>5</sup>Department of Cellular and Molecular Pharmacology, University of California, San Francisco, CA

13 <sup>6</sup>Quantitative Biosciences Institute (QBI), University of California, San Francisco, CA

14 <sup>7</sup>The J. David Gladstone Institutes, San Francisco, CA

15 <sup>8</sup>Immunity and Pathogenesis Program, Infectious and Inflammatory Disease Center, Sanford Burnham  
16 Prebys Medical Discovery Institute, La Jolla, CA

17 <sup>9</sup>Department of Microbiology, <sup>10</sup>Department of Medicine, Division of Infectious Diseases, <sup>11</sup>Global Health  
18 and Emerging Pathogens Institute, and <sup>12</sup>The Tisch Cancer Institute, Icahn School of Medicine at Mount  
19 Sinai, New York, NY

20 <sup>13</sup>Correspondence: P: 212-241-8284, F: 212-534-1684, E: melissa.uccellini@mssm.edu

## 22 Abstract

23 Ly6C<sup>hi</sup> inflammatory monocytes show high IFN responses, and contribute to both protective and pathogenic  
24 functions following influenza virus infection. In order to understand the significance of IFN responses in this  
25 subset, we examined monocytes during infection with a lethal H5N1 virus that induces high levels of IFN  
26 and a low-pathogenicity H1N1 virus that induces low levels of IFN. We show that H5N1 infection results in  
27 early recruitment of high numbers of Ly6C<sup>hi</sup> monocytes and induction of chemokines and *Ifnb1*. Using  
28 unbiased transcriptomic and proteomic approaches, we also find that monocytes are significantly enriched  
29 during H5N1 infection and are associated with chemokine and IFN signatures in mice, and with severity of  
30 symptoms after influenza virus infection in humans. Recruited Ly6C<sup>hi</sup> monocytes subsequently become  
31 infected in the lung, produce IFN- $\beta$ , and mature into FasL<sup>+</sup> monocyte-derived cells (FasL<sup>+</sup>MCs) expressing  
32 dendritic cell markers. Both *Ccr2*<sup>-/-</sup> and *Fasl*<sup>gld</sup> mice are protected from lethal infection, indicating that  
33 monocytes contribute to pathogenesis. Global loss of type I and type III IFN signaling in *Stat2*<sup>-/-</sup> mice results  
34 in loss of monocyte recruitment, likely reflecting a requirement for IFN-dependent chemokine induction.  
35 Here we show that IFN is not directly required for monocyte recruitment on an IFN-sufficient background,  
36 but is required for maturation to FasL<sup>+</sup>MCs. Loss of IFN signaling skews to a Ly6C<sup>lo</sup> phenotype associated  
37 with tissue repair, suggesting that IFN signaling in monocytes is a critical determinant of influenza virus  
38 pathogenesis.

## 40 Introduction

41 Monocytes are hematopoietic cells that develop from myeloid progenitors in the bone marrow and traffic  
42 via the bloodstream to peripheral tissues. Chemokine (C-C motif) receptor 2 (CCR2) is required for their  
43 release from the bone marrow into the blood, in a process dependent on both chemokine (C-C motif) ligand  
44 2 (CCL2) and CCL7. Recruitment of monocytes from the blood to the tissues is independent of CCR2 and  
45 likely involves other chemokines (1-3). Monocytes are defined by expression of CD115 and CD11b, and  
46 are divided into two subsets termed “inflammatory” and “patrolling” monocytes. Inflammatory monocytes  
47 express high levels of Ly6C and CCR2 in mice, and are CD14<sup>+</sup>CCR2<sup>+</sup>CD16<sup>-</sup> in humans. Patrolling  
48 monocytes express low levels of Ly6C, no CCR2 and are GFP<sup>hi</sup> in CX3CR1<sup>GFP</sup> mice, and are  
49 CD14<sup>lo</sup>CX3CR1<sup>hi</sup>CD16<sup>+</sup> in humans. Inflammatory signals lead to recruitment of Ly6C<sup>hi</sup> monocytes to sites  
50 of infection, where they differentiate into various tissue macrophage and dendritic cell populations that aid  
51 in infection clearance. Ly6C<sup>hi</sup> monocytes can give rise to Ly6C<sup>lo</sup> monocytes (4-7), although development  
52 independent of Ly6C<sup>hi</sup> monocytes is also supported by some studies (8, 9). The Ly6C<sup>lo</sup> subset has been  
53 associated with wound healing and tissue remodeling following injury or infection (10-12).

54  
55 During influenza virus infection, monocytes have been shown to contribute to both protective functions, and  
56 tissue damage when recruited in excess numbers. Monocyte populations that have differentiated into

57 effector cells in the lung have been termed various things during influenza virus infection – including  
58 monocyte DCs, TNF- $\alpha$ /iNOS-producing DCs, inflammatory DCs, exudate macrophages, and inflammatory  
59 monocyte-macrophages (13-15). Currently there is no naming consensus for these populations, which has  
60 led to confusion in the literature. Here we follow the naming convention proposed by Williams (16) and  
61 refer to monocyte-derived cells differentiated in the influenza-infected lung as ‘FasL<sup>+</sup>MCs’ to denote that  
62 they are monocyte-derived cells (MCs) with the functional characteristic of FasL expression, in addition to  
63 DC markers including CD11c and MHC II. Importantly, they express CCR2, CD115 and CD64, and not  
64 CD24 indicating monocyte rather than dendritic cell origin. The populations described in different studies  
65 likely represent similar, but heterogeneous differentiated MC populations. Monocyte accumulation in the  
66 lung has also been described in many infections including SARS-CoV-1 and SARS-CoV-2 (17-19).  
67 Influenza-infected *Ccr2*<sup>-/-</sup> mice fail to recruit monocytes, and show delayed viral clearance, decreased T cell  
68 accumulation in the draining lymph node, and decreased CD8<sup>+</sup> T cell priming (20, 21) supporting protective  
69 roles for monocytes. However, CCR2 deficiency protects from influenza-induced mortality in most studies  
70 (20, 22, 23), correlating with decreased lung injury – indicating that in many cases monocytes acquire  
71 pathogenic phenotypes and contribute to immune-mediated tissue damage.

72  
73 Type I and type III IFN are critical for restricting viral replication and systemic dissemination, as evidenced  
74 by the high susceptibility of *Ifnar1*<sup>-/-</sup> mice to a number of viruses (24). However, *Ifnar1*<sup>-/-</sup> mice infected with  
75 influenza virus show increased or decreased susceptibility to infection depending on the experimental  
76 conditions (25), making the precise role of IFN during influenza virus infection *in vivo* more difficult to define.  
77 This likely reflects the ability of IFN to act in many different ways on a wide-range of cell types, and to  
78 induce the expression of ISGs, which orchestrate later immune cell infiltration. Factors that influence the  
79 balance between the protective and pathogenic functions of IFN include the background of the mouse  
80 strain, the presence or absence of functional Mx1 expression, the viral strain, and redundancy between the  
81 functions of type I and type III IFN. Highly susceptible 129 and DBA/1 strains produce high levels of IFN,  
82 which subsequently leads to immune-mediated tissue damage (26). Therefore lack of IFN-signaling during  
83 influenza virus infection in these strains is protective. Similar differences in pathogenesis in *Ifnar1*<sup>-/-</sup> mice  
84 have been reported for SARS-CoV-1, with IFN mediating detrimental effects in highly susceptible BALB/c  
85 mice (17), but not C57BL/6 or 129 mice (27, 28). Most inbred mouse strains lack expression of Mx1 (29),  
86 however on an Mx1-sufficient background IFN is protective through induction of Mx1 expression and potent  
87 restriction of influenza virus replication. Importantly, the increased susceptibility phenotype is only strongly  
88 evident in strains lacking both type I and type III IFN signaling due to redundancy in Mx1 induction (30).  
89 Certain viral strains have the ability replicate outside of the lung due to ability of the hemagglutinin protein  
90 to be cleaved independently of trypsin-like proteases. In these strains, lack of type I IFN signaling is  
91 detrimental and leads dissemination of virus outside of the lung (31-34). Given the many different  
92 phenotypes of influenza-infected *Ifnar1*<sup>-/-</sup> mice, understanding the function of IFN on specific cell types  
93 during influenza virus infection will be important for understanding pathogenesis.

94  
95 Using an ISRE-dependent reporter mouse, we previously showed that Ly6C<sup>hi</sup> monocytes have high IFN  
96 responses following influenza virus infection (35), however the significance and specific function of IFN in  
97 this subset is not known. During influenza virus infection, monocytes have been shown to accumulate in a  
98 manner dependent on virus pathogenicity and type I IFN levels (22, 36, 37). In addition, in susceptible  
99 mouse strains, high IFN levels lead to excessive monocyte recruitment. IFN-dependent expression of  
100 TRAIL by monocytes subsequently leads to damage to the lung epithelium (26, 38). Here we investigated  
101 the functional significance of IFN signaling in Ly6C<sup>hi</sup> monocytes. We show that IFN-signaling is not directly  
102 required for recruitment, but is critical for maturation to a pathogenic phenotype. In the absence of IFN  
103 signaling monocyte phenotypes are skewed to a Ly6C<sup>lo</sup> phenotype associated with tissue repair, indicating  
104 that IFN signaling in monocytes is critical for determining the balance between the protective and  
105 pathogenic functions of type I IFN during influenza virus infection.

## 106 107 **Results**

### 108 ***Ly6C<sup>hi</sup> monocytes are associated with H5N1 infection in mice, and severity of symptoms in humans***

109 Using an ISRE-dependent reporter mouse for type I and type III IFN (*Mx1<sup>gfp</sup>*), we previously showed that  
110 Ly6C<sup>hi</sup> monocytes display very high IFN responses in the lung following influenza virus infection (35). In  
111 order to understand the significance of IFN responses in this subset, we examined monocytes during  
112 infection with either an avian H5N1 strain of influenza virus (A/Vietnam/1203/04 HALo) or a lab-adapted

113 H1N1 infection (A/PR/8/34). The HALo strain has been engineered to remove the hemagglutinin multibasic  
114 cleavage site, which limits systemic spread of the virus and allows use under BSL2 conditions, however  
115 the virus retains its other virulence determinants (39). At the doses examined, H5N1 induces an early IFN  
116 response that is sustained until the animals succumb to infection - while H1N1 induces a delayed IFN  
117 response, and the animals go on to survive infection (Fig 1A) (35). At day 2 post-infection, mice infected  
118 with H5N1 showed a large influx of Ly6C<sup>hi</sup> monocytes (Fig 1B). In contrast, mice infected with H1N1 showed  
119 Ly6C<sup>hi</sup> monocyte numbers similar to uninfected mice. We were unable to detect consistent viral titers at day  
120 2 post-infection in H5N1 or H1N1 infected animals, however day 3 post-infection both viruses replicated to  
121 high titers in the lung, (Fig 1C) suggesting viral replication did not account for the large differences in  
122 monocyte infiltration and infection. Using complementary unbiased transcriptomic and proteomic  
123 approaches, we compared the lung tissue of mice infected with the same H5N1 strain to another mild H1N1  
124 strain (A/California/04/09) at 12 hours, or 1, 2, 3 or 4 days post-infection. In order to identify immune cell  
125 subsets that may be differentially engaged by H5N1 and H1N1, we assessed the enrichment (i.e. overlap)  
126 between known transcriptomic (40) and proteomic (41) markers of immune cell subsets (T, B, NK,  
127 monocyte, mDC, pDC) among genes/proteins differentially expressed between the two strains. Monocytes  
128 were the only significantly enriched immune cell subset associated with H5N1 infection by transcriptomics  
129 (Fig 1D) and proteomics (Fig S1). Monocytic genes and proteins induced by H5N1 included the cell surface  
130 markers Cd14 and Fcgr1a as well as the interleukin Il15 and TLR4-ligand S100a9. In order to determine if  
131 the monocytes gene signature induced after H5N1 infection in lung of mice can also be detected in blood,  
132 we analyze an independent set of mice infected with H3N2 for which both lung and blood RNA-sequencing  
133 was performed [PMID:26413862]. The monocytes signatures was induced post-infection and reach it  
134 maximum induction 3 days following infection in both lung and blood.

135  
136 Subsequently, we investigated the use of the monocytes gene signature induced after H5N1 as being  
137 associated with influenza disease severity in human in a large meta-analysis of blood transcriptomic  
138 datasets [PMID: 30356117]. Fig 2). Similarly to the mice lung, the monocytes gene signature was induced  
139 day 2 to day 4 after infection in participants that developed severe symptoms. Genes in the monocyte  
140 signature that were most significantly associated with severity in human include the chemokine coding  
141 genes CXCL10 and CCL2. These subjects showed heightened expression of the TNF/NF $\kappa$ b confirming the  
142 pro-inflammatory environment triggered by the infection. Markers of monocytes (CD86, CCR5) and  
143 inflammasome activation (CASP1, NLRP3) required to activate pro-IL-1 $\beta$  and IL-18 were also associated  
144 with disease severity. Counterintuitively, this gene signature also included increased expression of the  
145 immunomodulatory cytokine IL-10 well known to be expressed by monocytes most probably as a negative  
146 feedback loop to overcome the heightened inflammatory environment triggered by infection. Similarly to  
147 H5N1 infected mice lung severe symptoms. The signature resolved by day 7 in all infected subjects.  
148 Altogether, these results highlight the pro-inflammatory environment triggered by H1N1 infection in human  
149 subjects which is largely attributed to the activation of cells of the monocyte lineage. The conservation of  
150 these gene signatures between mice and human infected with the flu virus and the association with disease  
151 severity suggests that monocyte activation is a hallmark feature of flu infection pathogenesis.

### 152 **H5N1 infection results in early chemokine and *lfnb1* production**

153  
154  
155 Ly6C<sup>hi</sup> monocytes produce the CCR2 ligands CCL2 and CCL7 in an IFN-dependent manner, which further  
156 amplifies their recruitment (17, 22). Consistent with this, animals infected with H5N1 showed robust  
157 induction of *Ccl2* and *Ccl7*, while mice infected with H1N1 did not show induction of these chemokines (Fig  
158 1E). Pathway enrichment analysis of the genes and proteins differentially expressed in H5N1 infected mice  
159 compared to H1N1 infected mice confirmed that *Ccl2* and *Ccl7*, as well as a number of other chemokines  
160 and cytokines are induced at early timepoints post-infection (Fig 1F).

161 Transcriptomic analysis also revealed a strong IFN signature at early time points in H5N1 infected mice. In  
162 addition, mice infected with H5N1, but not H1N1 showed robust induction of *lfnb1* (Fig 1G), consistent with  
163 a report showing *lfnb1* message in sorted Gr1<sup>+</sup>CD11b<sup>+</sup> cells (22). compared to H1N1 infected mice (Fig  
164 2C). Interferon-stimulated genes induced in H5N1 infected mice include the viral sensors Dhx58 and Ifih1  
165 and the transcription factor Irf9 (Fig 1H). This is consistent with the reported ability of H5N1 strains to induce  
166 a "cytokine storm" (42, 43).

167

168 ***Ly6C<sup>hi</sup> monocytes become infected and produce IFN- $\beta$  during H5N1 infection***

169 We next examined the phenotype of Ly6C<sup>hi</sup> monocytes following recruitment to the lung. At day 2 post-  
170 infection, H5N1-infected animals showed high numbers of Ly6C<sup>hi</sup> monocytes that were infected as indicated  
171 by surface expression of influenza M2 protein, consistent with other reports showing that monocytes can  
172 become infected with influenza virus (22, 44)(28555541). By day 2 post-infection, H5N1-infected animals  
173 showed high frequencies of GFP<sup>hi</sup> cells in H5N1-infected *Mx1<sup>gfp</sup>* mice ; H1N1 infected mice showed  
174 significantly lower numbers ( 10 fold ) of GFP<sup>hi</sup> cells than H5N1 infected mice (Fig 3A and 3B). Kinetic  
175 analysis showed that H5N1 infected mice showed significantly higher frequencies of We previously  
176 observed a lack of *Irfn1* induction in *Stat2<sup>-/-</sup>* mice (35), which was surprising given that *Irfn1* is induced  
177 independently of IFN signaling. Lack of *Irfn1* induction in both H5N1-infected *Stat2<sup>-/-</sup>* mice and H1N1  
178 infected WT mice (Fig 2A) correlated with lack of infiltration of Ly6C<sup>hi</sup> monocytes, suggesting that these  
179 cells might be a primary source of *Irfn1* during infection. In order to determine if Ly6C<sup>hi</sup> monocytes produce  
180 IFN- $\beta$ , we infected *Irfn1<sup>mob</sup>* mice, which express YFP from an internal ribosome entry site in the *Irfn1* locus,  
181 with H5N1 and monitored cells in the lung for YFP expression. We were able to detect YFP expression in  
182 ~18% of Ly6C<sup>hi</sup> monocytes, but not in other cell types including xxxx (Fig 2C), suggesting that Ly6C<sup>hi</sup>  
183 monocytes are indeed the main source of IFN- $\beta$  during influenza virus infection. We were unable to detect  
184 YFP expression at various time points post-infection with H1N1 (not shown), indicating that IFN- $\beta$  induction  
185 during H1N1 infection was below the limit of detection of the reporter gene. Ly6C<sup>hi</sup> monocytes were also  
186 GFP<sup>hi</sup> in H5N1-infected *Mx1<sup>gfp</sup>* mice, indicating they both produced, and responded to type I IFN (Fig 3A  
187 and D). Overall the data suggest that during H5N1 infection, Ly6C<sup>hi</sup> monocytes recruited to the lung become  
188 infected and both produce and respond to type I IFN to levels higher than other cell types present in the  
189 lung. High levels of type I IFN production by Ly6C<sup>hi</sup> monocytes in the lung likely contribute to increased  
190 infiltration of additional Ly6C<sup>hi</sup> monocytes by promoting expression of recruiting chemokines, contributing  
191 to a pathological feedback loop.

192

193 ***Ly6C<sup>hi</sup> mature into FasL<sup>+</sup>MCs during H5N1 infection***

194 Following recruitment to sites of infection, Ly6C<sup>hi</sup> monocytes mature into various effector cells with different  
195 functional characteristics. When we further examined the phenotype of Ly6C<sup>hi</sup> monocytes from H5N1-  
196 infected mice, we found they expressed higher levels of Ly6C, and upregulated CD11c and MHC Class II  
197 (Fig 4A). Influenza infection of 129 mice leads to high levels of IFN production and expression of TRAIL on  
198 Ly6C<sup>hi</sup> monocytes, leading to subsequent DR5-dependent tissue damage (23, 26). We did not detect TRAIL  
199 expression on Ly6C<sup>hi</sup> monocytes during H1N1 or H5N1 infection (not shown). FasL expression has also  
200 been reported to be upregulated during influenza virus infection (45, 46). When we examined FasL  
201 expression on Ly6C<sup>hi</sup> monocytes, we found FasL was upregulated on Ly6C<sup>hi</sup> monocytes at day 2 post-  
202 infection with H5N1 but not H1N1 (Fig 4A). We observed constitutive Fas expression on both hematopoietic  
203 and non-hematopoietic cells (not shown) as reported (45). The data suggest H5N1 infection leads to Ly6C<sup>hi</sup>  
204 monocyte infection, IFN- $\beta$  production, and maturation to a FasL<sup>+</sup>MC phenotype.

205

206 In order to determine if our transcriptomic data similarly supported the maturation of infiltrating monocytes,  
207 we used CIBERSORT a method that uses gene expression profiles to quantify the distribution of  
208 hematopoietic cell subsets based on gene expression profiles. This method infers 22 cell subsets –  
209 including monocytes, M0 (differentiated from monocytes), M1 (differentiated in LPS/IFN- $\gamma$ ), and M2  
210 (differentiated in LPS/IFN- $\gamma$ /IL-4) cells for the monocyte/macrophage lineage. Deconvoluting our  
211 transcriptional data using this method, we found an enrichment of "classically activated" M1 macrophages  
212 in H5N1-infected mice, which peaked at day 2 post-infection (Fig 4B). Importantly the "M1" classification  
213 denotes a proinflammatory phenotype, consistent with our flow cytometry findings, as opposed to the repair  
214 phenotype that defines the M2 subset. In order to determine if these M1 macrophages were derived from  
215 tissue-resident macrophages, or included mostly infiltrating monocyte-derived macrophages, we performed  
216 GSEA enrichment analysis to compare our transcriptomic signatures to known markers of tissue-resident  
217 vs. infiltrating macrophages. This analysis revealed the significant enrichment of monocyte-derived  
218 macrophage markers in the lungs of H5N1, compared to H1N1 infected mice supporting their origin from  
219 infiltrating cells (Fig 4C). Of note these recruited monocytes exhibited heightened expression of several  
220 markers of monocyte activation (Cd86, Cd40), markers of the complement pathways (C1), and chemokines  
221 including Ccl8 and Cxcl13 and as well Il10 and Arg2 two cytokines with anti-inflammatory activity reiterating  
222 that a negative feedback loop is put in place to counteract potential deleterious effect of the heightened  
223 pro-inflammatory response. Of note these cells express also several genes with anti-apoptotic activity (Bcl-

224 2 , Birc3) suggesting that they are resistant to cell death signals prevalent in his pro-inflammatory  
225 environment  
226

227 In order to determine if FasL expression was associated with M1 macrophages, we assessed the correlation  
228 between the frequency of M1 macrophages post-influenza infection, and cell death-specific pathways. This  
229 analysis showed enrichment for genes in the FasL pathway (Fig 4D) and a positive correlation of the FasL  
230 pathway with the inferred frequency of M1 macrophages (Fig 4E and Fig S3). FasL pathway was induced  
231 after H5N1 infection and reached its peak induction at day 3 post-infection. FasL pathway follow the same  
232 kinetics of response to infection as the monocyte signature but delayed by 1 day; this suggest that FasL  
233 pathway induction follow the induction of the FasL pathway. To test that FasL pathway is induced more  
234 strongly in severe flu disease and follow the induction of the monocytes gene signature, we analysed a  
235 publically available transcriptomic dataset of mice infected by two strains of H3N2 (one strain with low  
236 virulence and one highly virulent strain) [PMID:21874528]. This analysis confirmed that FasL pathway  
237 induction occurs 1 day following induction of the monocytes gene signature (Fig S3A) and revealed that  
238 FasL pathway is more strongly induced (> 3 fold-difference) by a virulent influenza strain (Fig S3B). The  
239 data suggest H5N1 infection is associated with maturation of Ly6C<sup>hi</sup> monocytes into a proinflammatory  
240 M1/FasL<sup>+</sup>MC phenotype  
241

### 242 ***Ly6C<sup>hi</sup> monocytes contribute to lethality during H5N1 infection***

243 During influenza virus infection, low-level monocyte recruitment is likely beneficial, while excessive  
244 recruitment can lead to lung injury. In order to determine whether monocyte recruitment was beneficial, or  
245 contributed to lethality during H5N1 infection, we infected WT and *Ccr2*<sup>-/-</sup> mice, which are unable to recruit  
246 monocytes from the bone marrow to the blood, with H5N1 and monitored survival. *Ccr2*<sup>-/-</sup> mice were  
247 completely protected following H5N1 infection (Fig 5A), suggesting they contribute to lung damage. In  
248 addition, *FasL*<sup>gld</sup> mice were partially protected following H5N1 infection (Fig 5B), suggesting that FasL is  
249 also a contributing factor to lung damage during H5N1 infection.  
250

### 251 ***IFN-signaling is not directly required for monocyte recruitment***

252 Using *Stat2*<sup>-/-</sup> mice, we previously reported that Ly6C<sup>hi</sup> monocyte recruitment is dependent on IFN signaling  
253 (35). Similar findings have also been reported in *Ifnar1*<sup>-/-</sup> mice (22, 36). Importantly, both *Ifnar1*<sup>-/-</sup> and *Stat2*<sup>-/-</sup>  
254 mice fail to induce ISGs including *Ccl2* and *Ccl7* (35, 36), which are required for the recruitment of Ly6C<sup>hi</sup>  
255 monocytes from the bone marrow to the blood. In order to address if IFN-signaling was directly required for  
256 Ly6C<sup>hi</sup> monocyte recruitment into the blood, we injected WT and *Stat2*<sup>-/-</sup> mice i.v. with CCL7 (47) and  
257 measured Ly6C<sup>hi</sup> monocyte recruitment to the blood. Although *Stat2*<sup>-/-</sup> mice had lower steady-state levels  
258 of Ly6C<sup>hi</sup> monocytes present in the blood, they were able to mobilize Ly6C<sup>hi</sup> monocytes from the bone  
259 marrow to the blood to the same extent as WT mice (Fig 6A). CCL2 injection in the lung has been reported  
260 to recruit Ly6C<sup>hi</sup> monocytes (48), however we were unable to reproduce these results. This is in agreement  
261 with work suggesting that CCL2 is required to recruit Ly6C<sup>hi</sup> monocytes from the bone marrow to the blood,  
262 however it is not required for recruitment from the blood to the tissues, suggesting that other signals mediate  
263 tissue entry from the blood (1-3).  
264

265 In a separate approach, we generated mixed bone marrow chimeras by reconstituting WT (CD45.1) mice  
266 with a 50:50 mix of WT (CD45.1) and *Stat2*<sup>-/-</sup> (CD45.2) bone marrow. In these mice, IFN signaling in both  
267 WT stromal cells and WT hematopoietic cells can induce CCL2 and CCL7 production. Following infection,  
268 mixed bone marrow chimeras show Ly6C<sup>hi</sup> monocyte as well as neutrophil recruitment to the lung following  
269 H5N1 infection (Fig 6B). Approximately equal ratios of WT and *Stat2*<sup>-/-</sup> Ly6C<sup>hi</sup> monocytes are present at day  
270 2 and day 3 post-infection (Fig 6C). This suggests that IFN signaling in monocytes is not directly required  
271 for the recruitment of Ly6C<sup>hi</sup> monocytes to the lung, but likely is required to induce chemokine production  
272 that subsequently leads to their recruitment.  
273

### 274 ***IFN-signaling is required for Ly6C<sup>hi</sup> monocyte maturation to FasL<sup>+</sup>MC phenotype***

275 In order to determine the importance of IFN signaling for the maturation of Ly6C<sup>hi</sup> monocytes into a  
276 FasL<sup>+</sup>MC phenotype, we infected *Stat2*<sup>-/-</sup> mice with H5N1 and examined surface marker expression. We  
277 found that Ly6C<sup>hi</sup> monocytes present in *Stat2*<sup>-/-</sup> mice fail to acquire a FasL<sup>+</sup>MC phenotype – they express  
278 lower levels of Ly6C, do not upregulate CD11c, and express lower levels of MHCII. Paradoxically, despite  
279 being defective in mounting an IFN-dependent response, they also express lower levels of influenza M2

280 protein. Importantly they also fail to upregulate FasL expression (Fig 7A). Because H5N1-infected *Stat2*<sup>-/-</sup>  
281 mice fail to induce CCL2 and CCL7 and show only low levels of monocyte recruitment (35), it is unclear  
282 whether this represents the same population of cells present in WT mice. In order to determine if *Stat2*<sup>-/-</sup>  
283 monocytes could mature in the presence of chemokines, we examined the phenotype of these cells in  
284 mixed bone marrow chimeras. Although *Stat2*<sup>-/-</sup> Ly6C<sup>hi</sup> monocytes could be recruited to the lung following  
285 H5N1 infection, they did not acquire a FasL<sup>+</sup>MC phenotype – they expressed lower levels of Ly6C and  
286 CD11c, lower levels of influenza M2, and failed to upregulate FasL (Fig 7B). Importantly no difference in  
287 expression of these markers was present in the absence of infection in Ly6C<sup>hi</sup> monocytes, or in the absence  
288 or presence of infection in neutrophils. Ly6C<sup>hi</sup> monocytes differentiate into Ly6C<sup>lo</sup> monocytes, which are  
289 involved in tissue repair (10-12). Importantly, while *Stat2*<sup>-/-</sup> monocytes did not acquire an activated FasL<sup>+</sup>MC  
290 phenotype, they accounted for the majority of Ly6C<sup>lo</sup> monocytes by day 3 post-infection in mixed bone  
291 marrow chimeras (Fig 6C and 7C). The data suggest that upon recruitment to the lungs, monocytes acquire  
292 a FasL<sup>+</sup>MC phenotype upon exposure to IFN, or differentiate into Ly6C<sup>lo</sup> monocytes in the absence of IFN  
293 signaling.

294

## 295 Discussion

### 296 *H5N1 infection is associated with monocytes, monocyte infection, and chemokines*

297 H5N1 infection in humans is characterized by fever, respiratory symptoms, leukopenia, and rapid  
298 progression to pneumonia, followed by acute respiratory distress syndrome (ARDS) and multiple organ  
299 dysfunction. Lung pathology is characterized by extensive infiltration, diffuse alveolar damage and hyaline  
300 membrane formation characteristic of ARDS. The virus has been reported to disseminate systemically in  
301 some cases, however most patients die of respiratory failure. A distinctive feature of H5N1 infection is high  
302 serum cytokine and chemokine levels referred to as “cytokine storm,” which has been suggested to  
303 contribute to the severity of disease (42, 43). Consistent with chemokine levels, infiltrate primarily composed  
304 of monocytes, macrophages, and neutrophils is observed in the lung (49-51). The severe infection, systemic  
305 spread, and cytokine phenotypes are also recapitulated in mouse models of H5N1 (52). Here we show that  
306 very early following H5N1 infection high numbers of Ly6C<sup>hi</sup> monocytes are found in the lungs. Many  
307 previous studies have identified infiltrating cells as macrophages by either histology or flow cytometry, but  
308 given the extent of influx and overlapping marker expression, these cells are likely MCs (22, 36, 37, 53). In  
309 addition, tissue-resident alveolar macrophage populations are rapidly depleted during influenza infection  
310 (54). Excessive monocyte infiltration has also been reported in SARS-CoV-2 (17-19). CCL2 and CCL7  
311 production in our study correlates with the influx of Ly6C<sup>hi</sup> monocytes, and previous studies have identified  
312 Ly6C<sup>hi</sup> monocytes as the primary producers of these chemokines (22, 36). Human histological sections also  
313 confirm monocyte/macrophage chemokine expression (55). Studies have also linked CCL2 and CCL7  
314 production to infiltrating monocytes during SARS-CoV-1 (17) and SARS-CoV-2 infection (56). In addition,  
315 we find extensive virus infection of Ly6C<sup>hi</sup> monocytes during H5N1 infection. Virus infection has been  
316 observed during H5N1 infection primarily in epithelial cells and monocytes/macrophages (49, 55) and in  
317 monocytes during H7N9 infection (57), and productive macrophage replication has been suggested to be  
318 a unique feature of these viruses (58). We and others (22, 44) have observed monocyte infection with H1N1  
319 strains, however in our experiments infection occurs at later time points in lower numbers of cells compared  
320 to H5N1 infection. Infection of macrophage subsets has also been reported in SARS-CoV-2 infection  
321 (<https://doi.org/10.1101/2020.03.27.20045427>). Whether infection and/or productive replication in  
322 monocytes are important determinants of H5N1 pathogenesis requires further investigation. Importantly,  
323 we also show that monocytes are the primary IFN producing and responding cells during infection; a finding  
324 also supported in vaccinia virus infection and lupus models (59, 60).

325

### 326 *Monocytes, FasL, TRAIL contribute to pathogenesis*

327 We show that monocytes contribute to pathogenesis during H5N1 infection, as *Ccr2*<sup>-/-</sup> mice are protected  
328 from mortality. Although *Ccr2*<sup>-/-</sup> mice show delayed viral clearance and decreased T cell priming (20, 21),  
329 they are protected from excessive lung damage and lethal influenza infection in most studies (20, 22, 23).  
330 Treatment with CCR2 depleting antibody also protects from SARS-CoV-1 lethality (17). TRAIL expression  
331 by MCs referred to as exudate macrophages contributes to lethal influenza virus infection (23). In addition,  
332 higher IFN levels in some mouse strains leads to Ly6C<sup>hi</sup> monocyte influx and TRAIL expression (26, 38).  
333 TRAIL neutralization protects from lung damage and death in both cases. Here we found FasL rather than  
334 TRAIL expression on Ly6C<sup>hi</sup> monocytes. Expression of FasL during influenza virus infection has also been  
335 reported in other studies, and neutralization or genetic mutation protects from lethal infection (45, 46). We

336 show MC expression of FasL, however FasL is also known to regulate T cell apoptosis during influenza  
337 virus infection (61), therefore it is possible that the effect of FasL on survival is mediated by cells other than  
338 monocytes. However, in the case of TRAIL-mediated tissue damage, T cell deficiency did not affect disease  
339 outcome (26). The reasons for differential expression of TRAIL and FasL are unknown but may be due  
340 variation in mouse or viral strains. Interestingly, neutralization of TRAIL or FasL during *in vitro* replication  
341 of influenza virus in epithelial cells leads to decreased viral titers, implying that the virus modulates cell  
342 death pathways to enhance replication (62). During SARS-CoV-1 infection, Ly6C<sup>hi</sup> monocytes also express  
343 FasL in an IFN-dependent manner (17), however TNF- $\alpha$  rather than FasL contributes to pathogenesis in  
344 this case, highlighting that MCs can mediate pathogenic effects through various mechanisms. Importantly,  
345 monocytes are not universally pathogenic; they are protective during RSV, HSV, and WNV infection (48,  
346 63).

#### 347 *IFN not required for recruitment, differentiation to Ly6C<sup>lo</sup>*

348 A number of studies have reported loss of Ly6C<sup>hi</sup> monocyte recruitment in *Ifnar1*<sup>-/-</sup> mice following infection  
349 with influenza (22, 35, 36), SARS-CoV-1 (17), and SARS-CoV-2 (19), however we show that IFN signaling  
350 in monocytes is not directly required for recruitment. In contrast, another report showed lower levels of  
351 Ly6C<sup>hi</sup> and higher levels of Ly6C<sup>lo</sup> monocytes in WT: *Ifnar1*<sup>-/-</sup> mixed bone marrow chimeras (64). However,  
352 monocyte recruitment was examined at day 7 in this study, whereas we found approximately equal ratios  
353 of WT and *Stat2*<sup>-/-</sup> Ly6C<sup>hi</sup> monocytes in mixed bone marrow chimeras at both day 2 and 3 post-infection.  
354 Given that we found an absence of IFN-signaling was associated with increased Ly6C<sup>lo</sup> monocytes at day  
355 3, it is likely that many of the recruited *Ifnar1*<sup>-/-</sup> Ly6C<sup>hi</sup> cells had converted to Ly6C<sup>lo</sup> cells by day 7. A number  
356 of labeling studies provide evidence that Ly6C<sup>hi</sup> monocytes can give rise to Ly6C<sup>lo</sup> monocytes (reviewed in  
357 (65)). However Ly6C<sup>hi</sup> but not Ly6C<sup>lo</sup> monocyte production is effected by the absence of the transcription  
358 factors IRF8 and KLF4 (8, 9), suggesting that alternate developmental pathways may exist. In addition,  
359 mice deficient for the transcription factor Nur77 lack Ly6C<sup>lo</sup> monocytes specifically (66). The relative  
360 importance of these proposed developmental pathways is unknown and is likely to vary under pathologic  
361 conditions. In a mouse model of pristane-induced inflammation, IFN-signaling stimulated the production of  
362 chemokines that recruited Ly6C<sup>hi</sup> monocytes to the peritoneum via CCR2. *Ifnar*<sup>-/-</sup> mice had high levels of  
363 Ly6C<sup>lo</sup> monocytes consistent with our findings; labeling experiments supported a differentiation of Ly6C<sup>lo</sup>  
364 cells from Ly6C<sup>hi</sup> precursors (67). Regardless of whether Ly6C<sup>lo</sup> monocytes differentiate from Ly6C<sup>hi</sup>  
365 precursors, or develop independently, type I IFN signaling appears to be important for controlling the  
366 balance between the subsets. Ly6C<sup>lo</sup> monocytes are generally thought to differentiate into resident  
367 macrophages that promote wound healing and resolution of inflammation. They produce only low levels of  
368 proinflammatory cytokines, and higher levels of anti-inflammatory factors including IL-1RA, IL10R, and  
369 ApoA/E, and CXCL16 (68). Ly6C<sup>lo</sup> monocytes patrol the vasculature and remove damaged cells (68, 69).  
370 They also cross-present antigens derived from apoptotic cells, and promote tolerogenic responses through  
371 expression of PDL1 (70). How these cells contribute to influenza virus infection remains to be investigated.  
372

#### 373 *IFN required for monocyte maturation to MCs*

374 *Stat2*<sup>-/-</sup> Ly6C<sup>hi</sup> monocytes fail to differentiate into FasL<sup>+</sup>MCs, indicating that IFN signaling regulates the  
375 maturation of Ly6C<sup>hi</sup> monocytes into MCs. Consistent with this, monocytes in human blood have been  
376 reported to be infected with a number of viruses, and differentiate into MCs that express dendritic cell  
377 markers in association with type I IFN production and ISG upregulation (17, 71, 72). IFN treatment has also  
378 been reported to lead to maturation of human monocytes into TRAIL<sup>+</sup>MCs, which induce IL-15 production  
379 and promote T cell responses (73). The Aryl hydrocarbon receptor (AhR) and IRF4 have been reported to  
380 be involved in differentiation of Ly6C<sup>hi</sup> monocytes into MCs in both human and mouse experiments (74).  
381 Interestingly, we observed much lower levels of Ly6C<sup>hi</sup> monocyte infection in *Stat2*<sup>-/-</sup> cells, implying that the  
382 differentiation to a MC phenotype in some way influences susceptibility to infection, an observation that is  
383 currently under investigation. Important roles for Ly6C<sup>hi</sup> monocyte IFN signaling have also been defined in  
384 other infection models. Ly6C<sup>hi</sup> monocytes control CD8<sup>+</sup>T cell and NK cell immunity through IFN-induced  
385 IL-18 and IL-15 production in response to a variety of bacterial, viral, and parasite infections (75). During  
386 HSV-2 infection, IFN signaling in inflammatory monocytes leads to IL-18 production, which subsequently  
387 activates NK cells that are critical for clearance of infection (76). In a *Candida* infection model, type I IFN-  
388 dependent IL-15 production by inflammatory monocytes in the spleen is critical for the activation of NK cells  
389 and neutrophils (77). Thus while IFN appears to have important effects on the maturation of Ly6C<sup>hi</sup>  
390 monocytes into MCs, the resulting effects are protective in many cases, but pathogenic in some cases.  
391

392  
393  
394  
395  
396  
397  
398  
399  
400  
401  
402  
403  
404  
405  
406  
407

*Model*

Altogether the data suggest a model for how type I IFNs contribute to H5N1 pathogenesis (Fig 8). Upon initial infection, influenza virus is detected by both epithelial and hematopoietic cells resulting in an initial wave of IFN- $\alpha/\beta$  and  $\lambda$  production. pDCs and alveolar macrophages have been defined as the primary IFN-producing cells at early time points following respiratory virus infection (78). This IFN is detected by resident Ly6C<sup>hi</sup> monocytes, which signal through IFNAR1/2 to induce the production of ISGs including CCL2 and CCL7 – leading to an influx of Ly6C<sup>hi</sup> monocytes from the bone marrow to the blood. Additional factors control the recruitment from the blood to the lung. Recruitment of these monocytes is not directly dependent on IFN, but is dependent on IFN-induced chemokine production. Once recruited to the lung Ly6C<sup>hi</sup> monocytes mature into various MC effector populations dependent on the level of IFN. In the absence of IFN-signaling *Stat2*<sup>-/-</sup> cells become Ly6C<sup>lo</sup>, a phenotype associated with tissue repair. Intermediate levels of IFN likely facilitate beneficial outcomes including T cell priming and viral clearance. In the case of H5N1 infection, Ly6C<sup>hi</sup> monocytes become infected, produce high levels of IFN- $\beta$  and CCL2/7 – leading to excess influx, and mature into MCs that expresses CD11c, MHC Class II, and FasL facilitating tissue destruction.



408

**Figures**

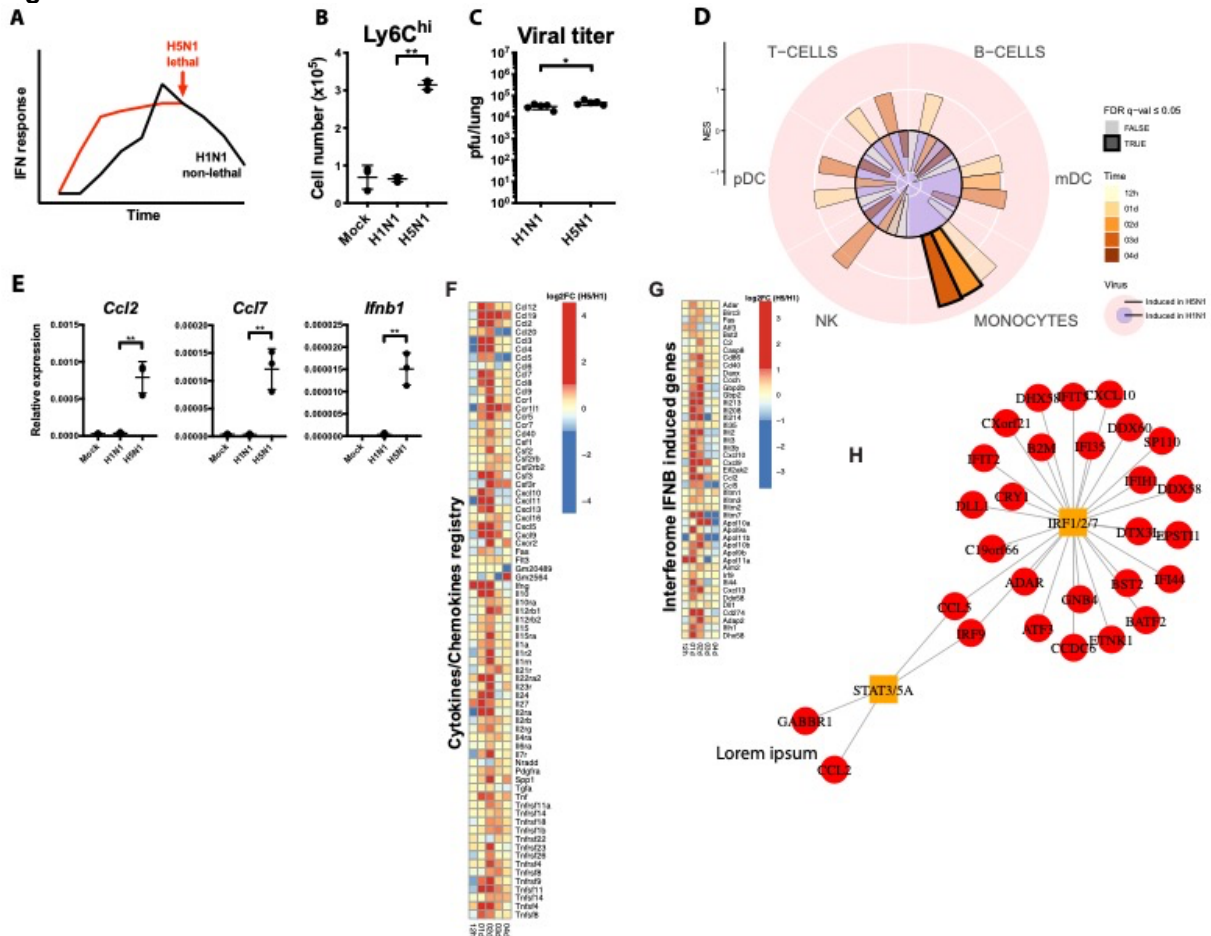

409

410

**Figure 1. Monocytes are associated with H5N1 infection**

(A) IFN response and pathogenesis of H1N1 and H5N1 at the doses used in this study

(B) Mice were infected with  $10^2$  pfu of H1N1 or H5N1 and Ly6C<sup>hi</sup> monocyte (Ly6C<sup>hi</sup>CD11b<sup>+</sup>Ly6G<sup>-</sup>) infiltration and was determined by flow cytometry at day 2 post-infection (n=3).

(C) Mice were infected as in B and viral titer was determined by plaque assay at day 3 post-infection. Data are representative of 3 experiments for B and 2 experiments for C. \*p<0.05\*\*p<0.01

(D) Gene Set Enrichment analysis was performed to assess the enrichment of transcriptomic markers of immune cells (B, T, NK, Monocytes, mDC, pDC; (40) among genes differentially expressed between H5N1- and H1N1-infected mice in lung tissue. The radial plot presents the Normalized enrichment score (NES) of each set of markers (quadrants) for different timepoints investigated after infection (bars). A NES > 0 correspond to enrichment of cell markers among genes induced in H5N1 compared to H1N1 while a NES < 0 corresponds to the enrichment of cell markers among genes repressed in H5N1 compared to H1N1. A permutation test was performed to assess the significance of each enrichment; opaque bars correspond to enrichment with a false discovery rate (FDR) below 0.05.

(E) Mice were infected with  $10^2$  pfu of H1N1 or H5N1 and Ly6C<sup>hi</sup> monocyte (Ly6C<sup>hi</sup>CD11b<sup>+</sup>Ly6G<sup>-</sup>) infiltration and chemokine induction was determined by qPCR at day 2 post-infection (n=3). Data are representative of 3 experiments. \*\*p<0.01

(F) Heatmap showing the log<sub>2</sub> fold-change (log<sub>2</sub>FC) of genes coding for cytokines/chemokines between H5N1- and H1N1-infected mice in lung tissue. A blue-white-red color gradient depicts the gene the most repressed to the gene the most induced in H5N1-infected mice compared to H1N1-infected mice.

(G) Gene Set Enrichment Analysis (GSEA) was performed to assess the enrichment (i.e. overlap) of interferon-stimulated genes (IFN- $\alpha$ ,  $\beta$ ,  $\lambda$ , and  $\gamma$  induced genes; (80)) among genes differentially expressed between H5N1- and H1N1-infected mice in lung tissue. This analysis revealed a significant enrichment of IFN- $\beta$ -induced genes in the lungs of H5N1-infected mice on day 2. The heatmap shows the log<sub>2</sub>FC of

433

434 genes contributing to the IFN- $\beta$ -induced gene enrichment in H5N1-infected mice compared to H1N1-  
435 infected mice.

436 **(H)** GSEA was used to identify transcription factors (TF) upstream of IFN- $\beta$ -induced genes in the lungs of  
437 H5N1-infected mice on day 2. In the network, TF (square) and their targets (circle) are linked (edge) if there  
438 is a putative binding sites in the 2000 bases around the TSS of the target genes or that the genes was  
439 differentially regulated in TF-overexpression or knock-out experiments.  
440

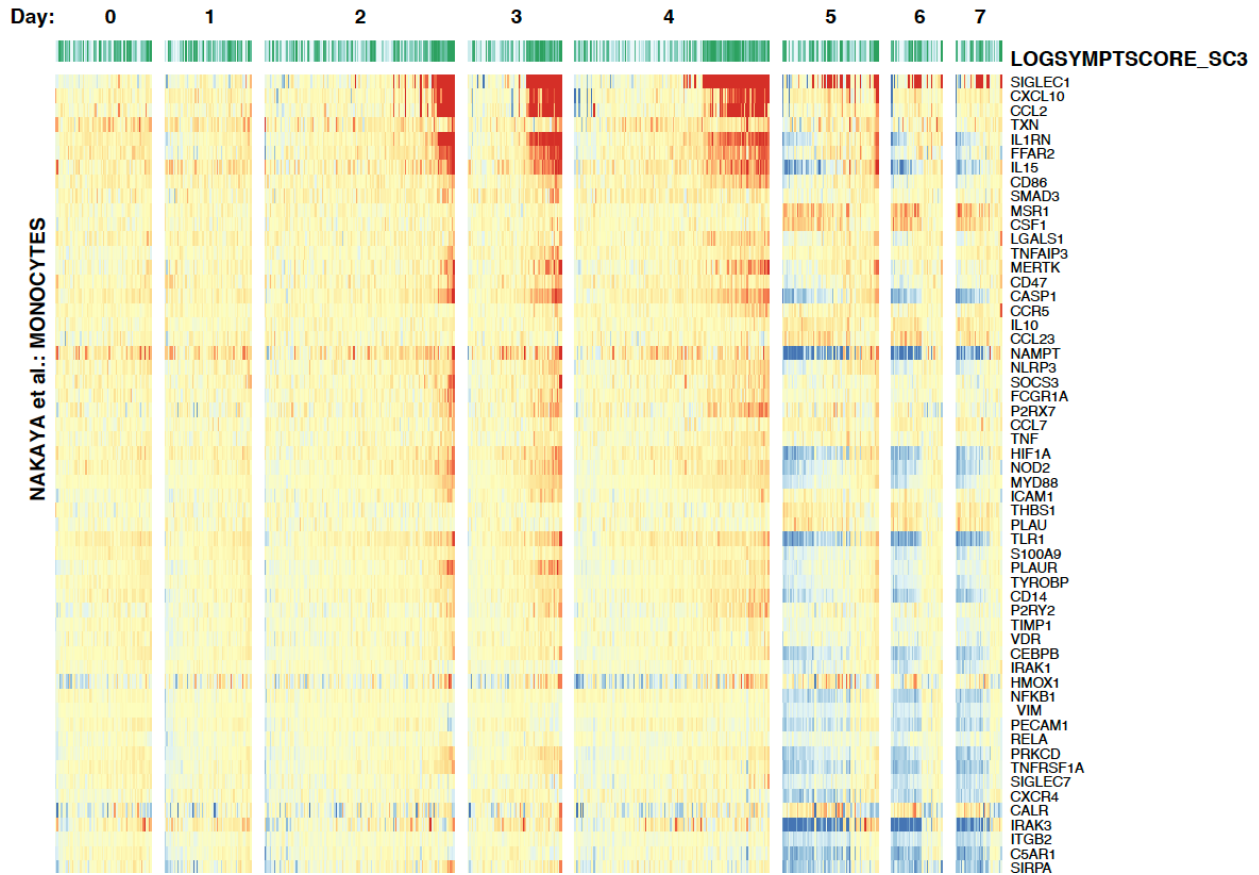

441  
442 **Figure 2. Monocyte signature associated with severity in human** Gene Set Enrichment Analysis  
443 (GSEA) was performed to assess the enrichment (i.e. overlap) of transcriptomic markers of immune cells  
444 (B, T, NK, Monocytes, mDC, pDC) among genes expressed in blood of healthy adults challenged with  
445 H1N1 and correlated with severity of symptoms (LOGSYMTOMSCORE; (79)). A significant enrichment of  
446 monocyte signature was observed on days 2, 3 and 4. The heatmap shows the expression of transcriptomic  
447 markers of monocytes contributing to this enrichment. A blue-white-red color gradient represents down-  
448 regulation to up-regulation of the gene-expression scaled across samples (z-score).  
449  
450  
451

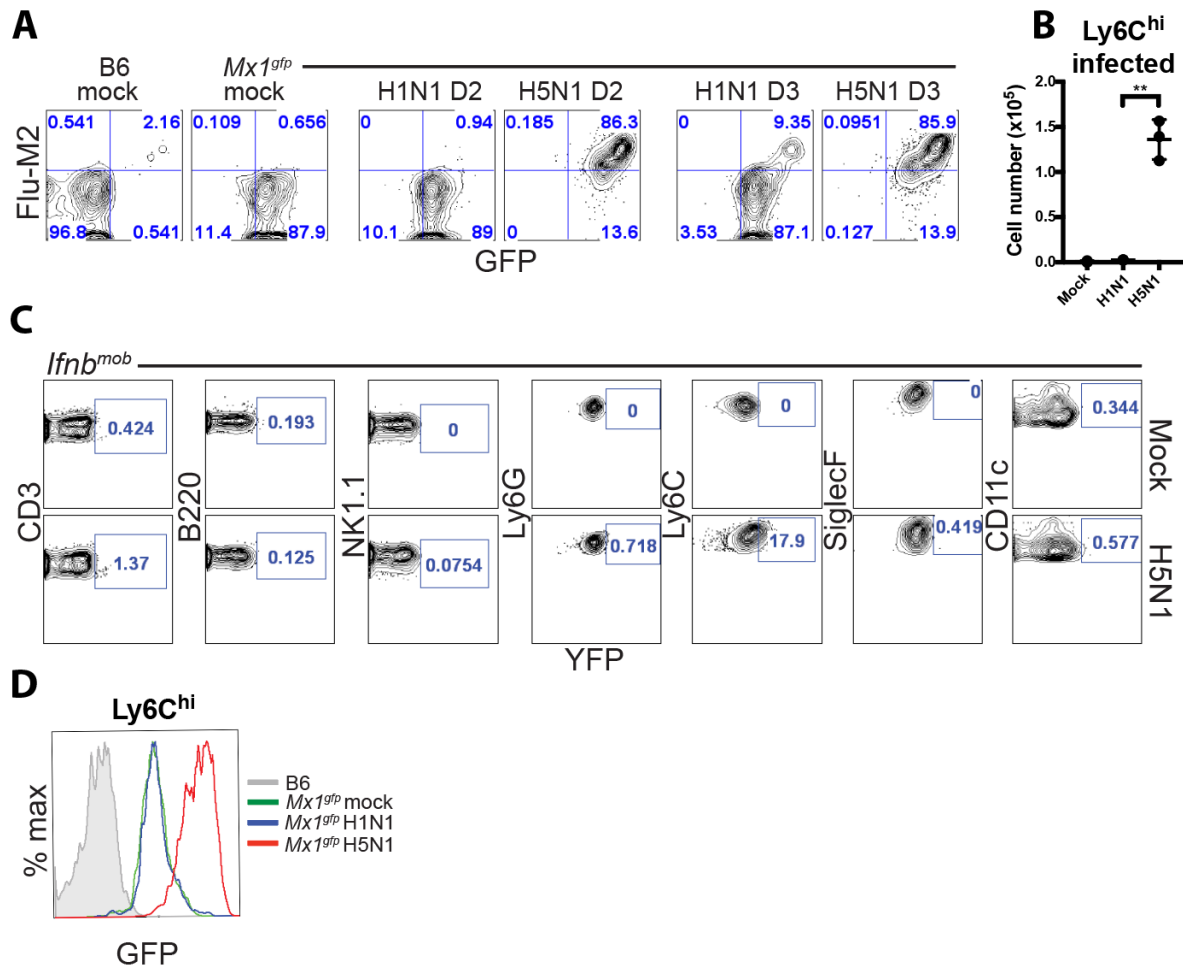

452  
453  
454  
455  
456  
457  
458  
459  
460  
461  
462

**Figure 3. Monocytes become infected and produce IFN-β and ISGs**

(A) *Mx1<sup>gfp</sup>* mice were infected with 10<sup>2</sup> pfu of H1N1 or H5N1 and surface Flu-M2 expression on Ly6C<sup>hi</sup> monocytes was determined by flow cytometry at day 2 and 3 post-infection.  
 (B) Quantification of A (n=3). Data are representative of 3 experiments. \*\*p<0.01.  
 (C) *Ifnb<sup>mob</sup>* mice were infected with 10<sup>2</sup> pfu of H5N1 and YFP expression was measured by flow cytometry at day 3 post-infection (n=2). Data are representative of 3 experiments.  
 (D) *Mx1<sup>gfp</sup>* mice were infected with 10<sup>2</sup> pfu of H1N1 or H5N1 and GFP expression was measured in Ly6C<sup>hi</sup> monocytes. Data are representative of 3 experiments.

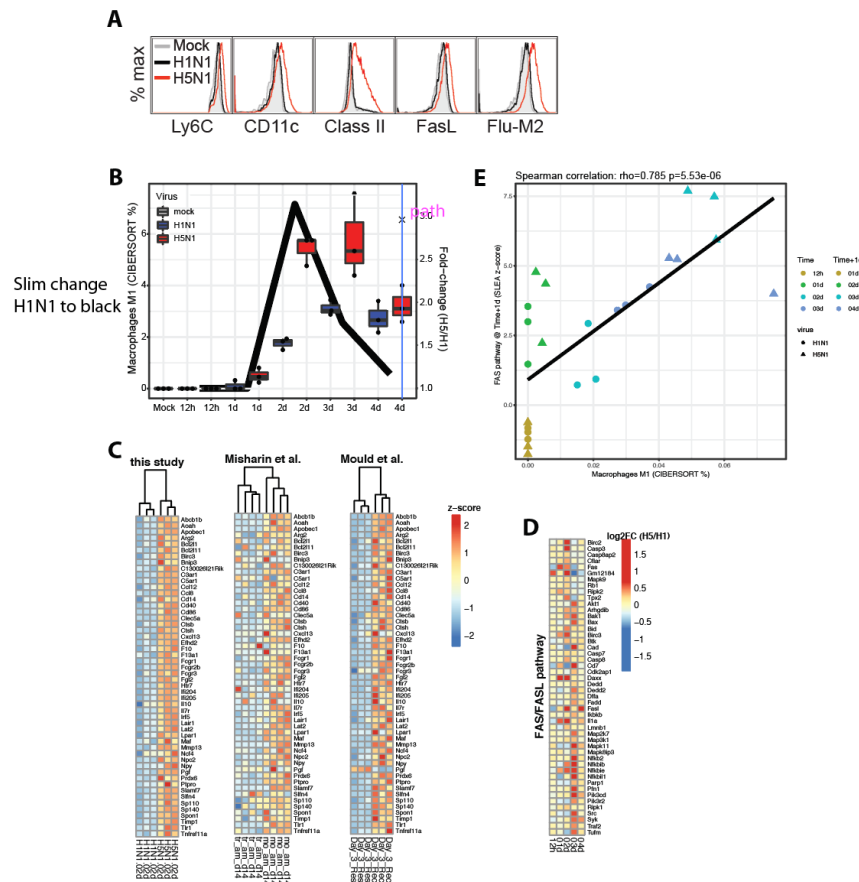

463  
464 **Figure 4. Monocytes mature into M1/FasL+MC phenotype during severe infection**  
465 (A) Mice were infected with  $10^2$  pfu of H1N1 or H5N1 and expression of the indicated markers on Ly6C<sup>hi</sup>  
466 monocytes was determined at day 2 post-infection (n=3). Data are representative of 3 experiments.  
467 \*\*p<0.01  
468 (B) Cibersort (81) was used to infer cell frequencies based on RNA-Seq data. Boxplot of inferred  
469 Macrophage M1 (IL-12<sup>high</sup>, IL-23<sup>high</sup>, IL-10<sup>low</sup> phenotype, polarized by LPS) frequencies in lung of H5N1-,  
470 H1N1- and mock-infected mice at different timepoints following infection.  
471 (C) Transcriptomic expression of genes induced in monocyte-derived macrophages compared to tissue  
472 resident macrophages in the lung of H5N1- and H1N1-infected mice. GSEA enrichment analysis was used  
473 to test for enrichment of transcriptomic markers of monocyte-derived macrophages and of tissue resident  
474 macrophages (82, 83). A significant enrichment of monocyte-derived macrophage markers among genes  
475 induced in H5N1- vs. H1N1-infected mice. Genes contributing to the enrichment (i.e. overlapping monocyte-  
476 derived macrophages and induced in H5N1 infected mice) are shown in the heatmaps. A blue-white-red  
477 color gradient represents down-regulation to up-regulation of the gene-expression scaled across samples  
478 (z-score).  
479 (D) Gene Set Enrichment Analysis (GSEA) was performed to assess the enrichment (i.e. overlap) of  
480 transcriptomic markers of cell death pathways (Apoptosis, Pyroptosis, Necrosis) among genes differentially  
481 expressed between H5N1- and H1N1-infected mice in lung tissue. This analysis revealed a significant  
482 enrichment of Fas-mediated cell death in the lung of H5N1-infected mice at day 3. The heatmap shows the  
483 log2FC of genes contributing to the Fas pathway enrichment in H5N1-infected mice compared to H1N1-  
484 infected mice.  
485 (E) Scatter plot showing the levels of Fas pathway (summarized using the SLEA z-score method) in the  
486 lung of H5N1-, H1N1- and mock-infected mice as a function of the inferred frequency of M1 macrophage  
487 (inferred from Cibersort) the preceding day. A Spearman correlation and t-test was used to statistically  
488 assess the correlation.

489

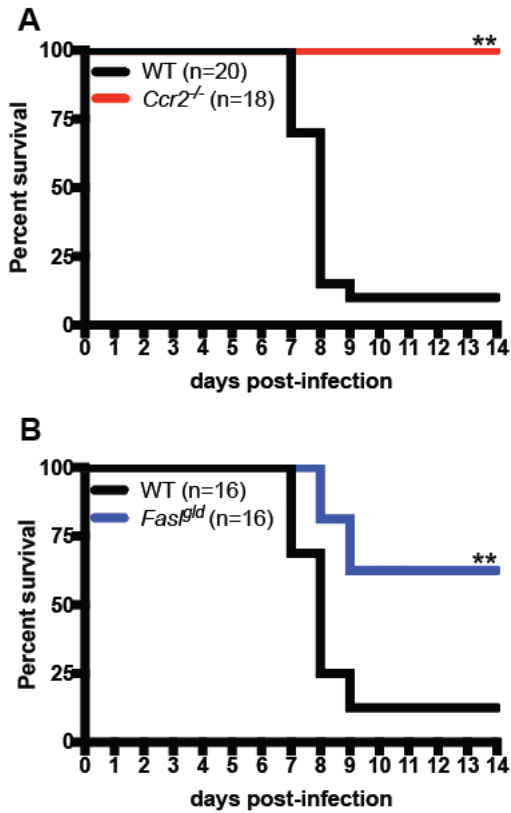

490

491

**Figure 5. Monocytes contribute to lethality during severe infection.**

492 (A) WT and *Ccr2*<sup>-/-</sup> mice were infected with 10 pfu of H5N1 and survival was measured.

493 (B) WT and *Fas*<sup>gld</sup> mice were infected as in A and survival was measured. Data show combined results of  
494 2 experiments with similar results. \*\*p<0.01.

495

496

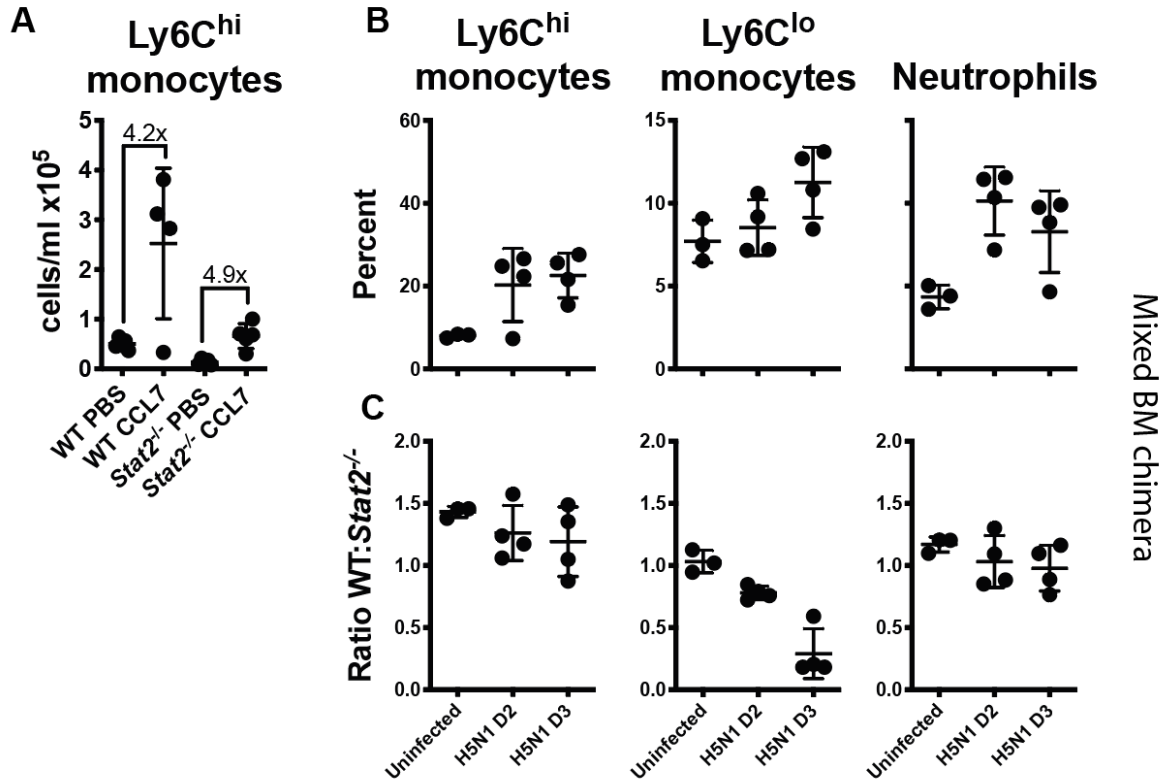

497  
498  
499  
500  
501  
502  
503  
504  
505  
506  
507  
508  
509  
510

**Figure 6. IFN-signaling is not directly required for monocyte recruitment.**

(A) WT and *Stat2*<sup>-/-</sup> mice were injected IV with CCL7 and Ly6C<sup>hi</sup> monocytes in the blood were measured by flow cytometry at 30 min (n=4). (B) WT:*Stat2*<sup>-/-</sup> → WT 50:50 mixed bone marrow chimera were infected with 10<sup>2</sup> pfu of H5N1 and Ly6C<sup>hi</sup> and Ly6C<sup>lo</sup> monocyte, and neutrophil influx was measured by flow cytometry at day 2 and 3 post-infection (n=4). Data are representative of 2 experiments.

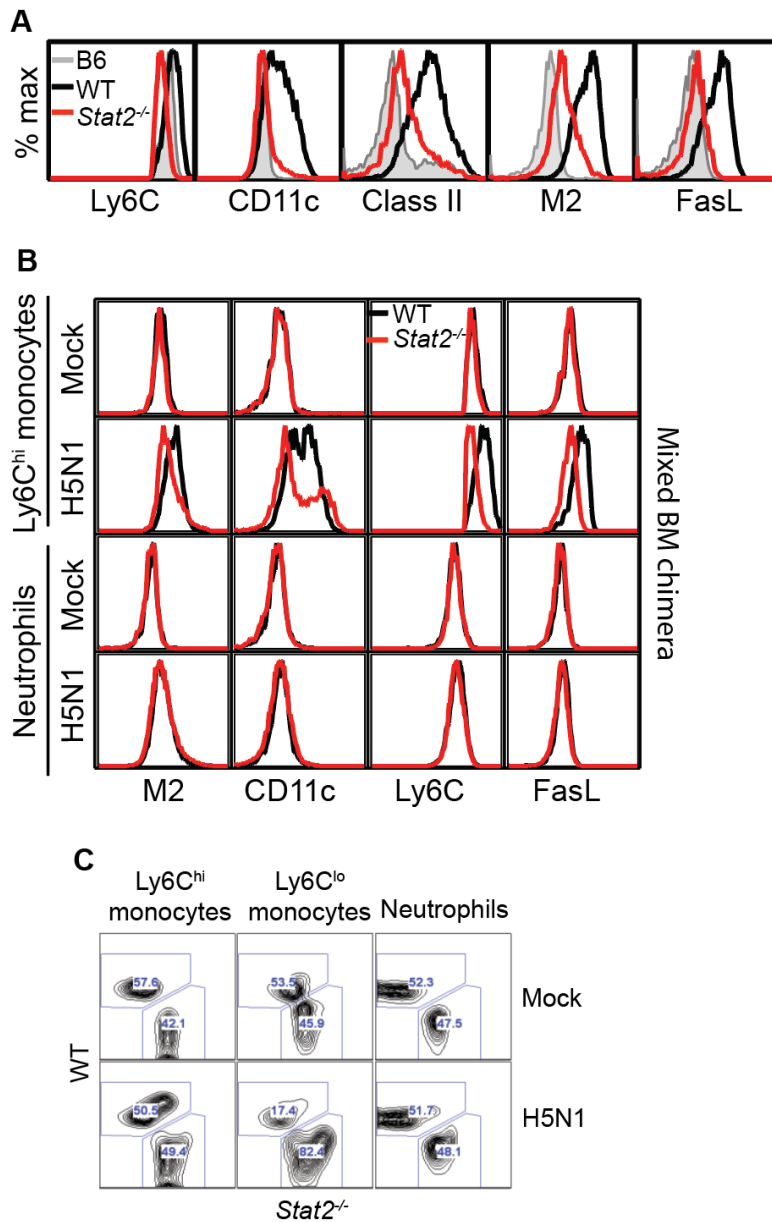

511  
 512 **Figure 7. IFN signaling is required for maturation to FasL<sup>+</sup>MCs.** (A) WT and *Stat2*<sup>-/-</sup> mice were infected  
 513 with 10<sup>2</sup> pfu of H5N1 and expression of the indicated markers on Ly6C<sup>hi</sup> monocytes was determined at day  
 514 2 post-infection (n=3). (B) WT:*Stat2*<sup>-/-</sup> → WT 50:50 mixed bone marrow chimeras were infected with 10<sup>2</sup> pfu  
 515 of H5N1 and expression of the indicated markers on Ly6C<sup>hi</sup> monocytes and neutrophils was determined by  
 516 flow cytometry (n=4). Data are representative of 3 experiments for A and 2 for B.

517  
 518

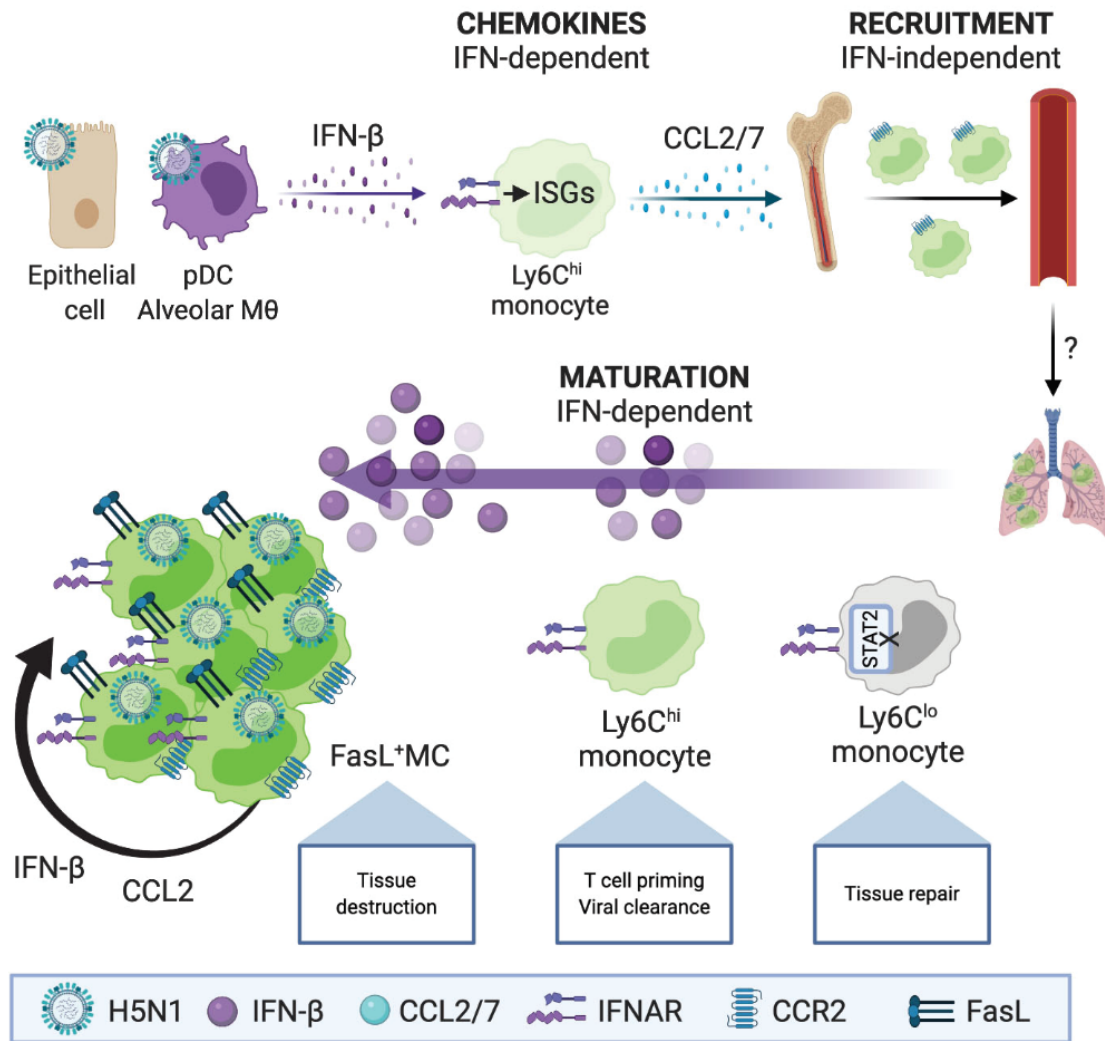

519  
520  
521  
522  
523  
524  
525  
526  
527  
528  
529  
530  
531

**Figure 8. Model of the role of IFN in influenza virus infection.**

Following initial infection a primary wave of IFN is produced by epithelial cells, pDCs and alveolar macrophages. This induces the production of ISGs including CCL2 and CCL7, leading to Ly6C<sup>hi</sup> monocyte recruitment to the lung – in a manner not directly dependent on IFN. Once recruited to lung, maturation of monocytes is regulated by the level of IFN. Lack of IFN-signaling in *Stat2*<sup>-/-</sup> cells leads to skewing to a Ly6C<sup>lo</sup> phenotype, associated with tissue repair. Intermediate levels of IFN likely lead to T cell priming and viral clearance. During H5N1 infection, Ly6C<sup>hi</sup> monocytes become infected, secrete high levels of IFN and chemokines – leading to further recruitment, and mature into a CD11c+MHCII+FasL<sup>+</sup> MC phenotype and tissue destruction.



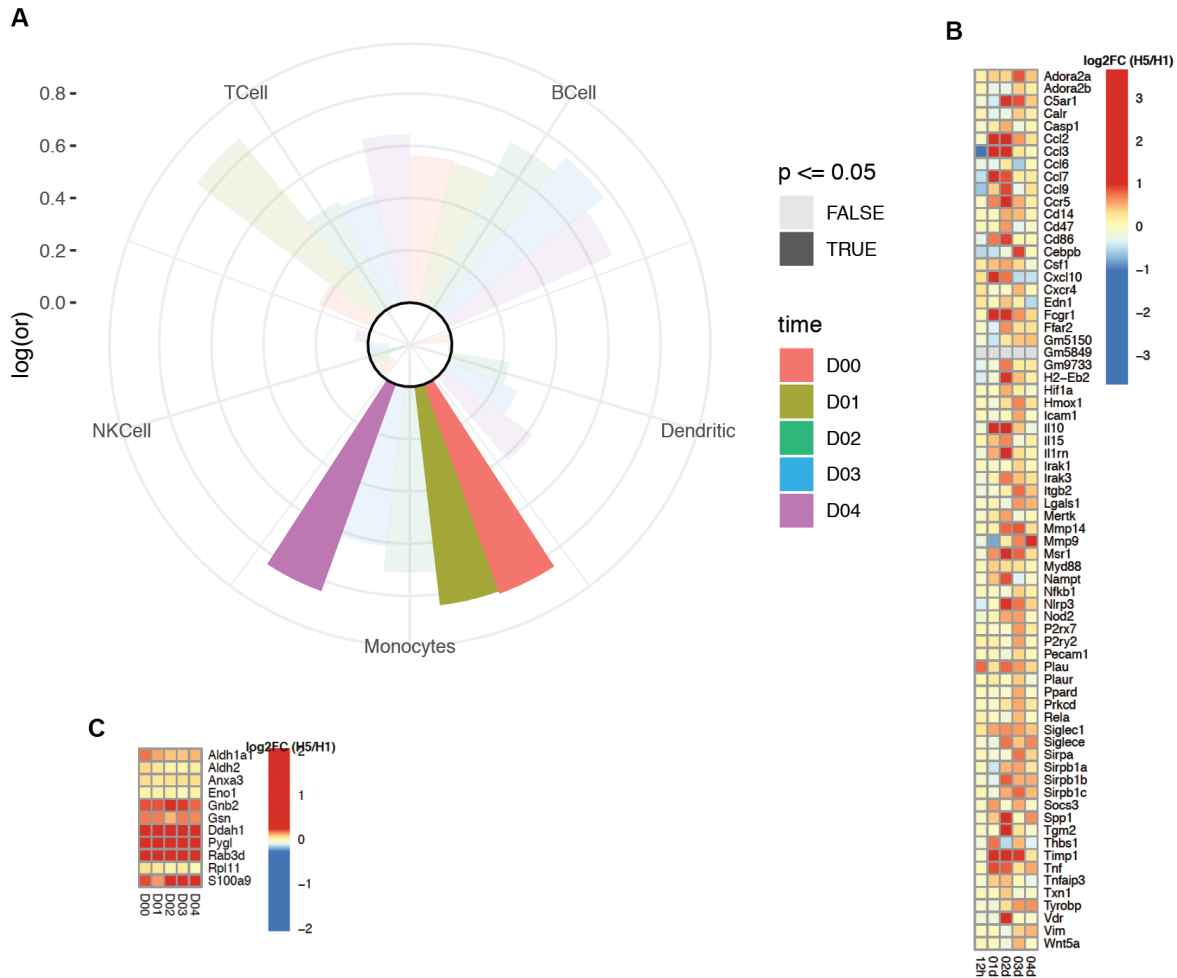

532  
 533 **Figure S1. Proteomic markers of monocytes are preferentially induced following H5N1 infection**  
 534 (A) Fisher's exact test was used to assess statistically the overlap between protein markers of immune cells  
 535 (B, T, NK, Monocytes, DC) among proteins differentially expressed between H5N1- and H1N1-infected  
 536 mice in lung tissue. The radial plot presents the log odd ratio (log(or)) of each set of markers (quadrants)  
 537 for different timepoints investigated after infection (bars). A log odd ratio > 0 correspond to overlap of cell  
 538 markers among proteins induced in H5N1 compared to H1N1 while a log odd ratio < 0 corresponds to the  
 539 enrichment of cell markers among proteins repressed in H5N1 compared to H1N1. Benjamini-Hochberg  
 540 correction was used to adjust for false positives. (B) Heatmap showing the log<sub>2</sub> fold-change (log<sub>2</sub>FC)  
 541 of monocytes transcriptomic markers between H5N1- and H1N1-infected mice in lung tissue. A blue-white-  
 542 red color gradient depicts the gene the most repressed to the gene the most induced in H5N1-infected mice  
 543 compared to H1N1-infected mice. (C) Heatmap showing the log<sub>2</sub> fold-change (log<sub>2</sub>FC) of monocytes  
 544 proteomic markers between H5N1- and H1N1-infected mice in lung tissue. A blue-white-red color gradient  
 545 depicts the protein the most repressed to the protein the most induced in H5N1-infected mice compared to  
 546 H1N1-infected mice.  
 547

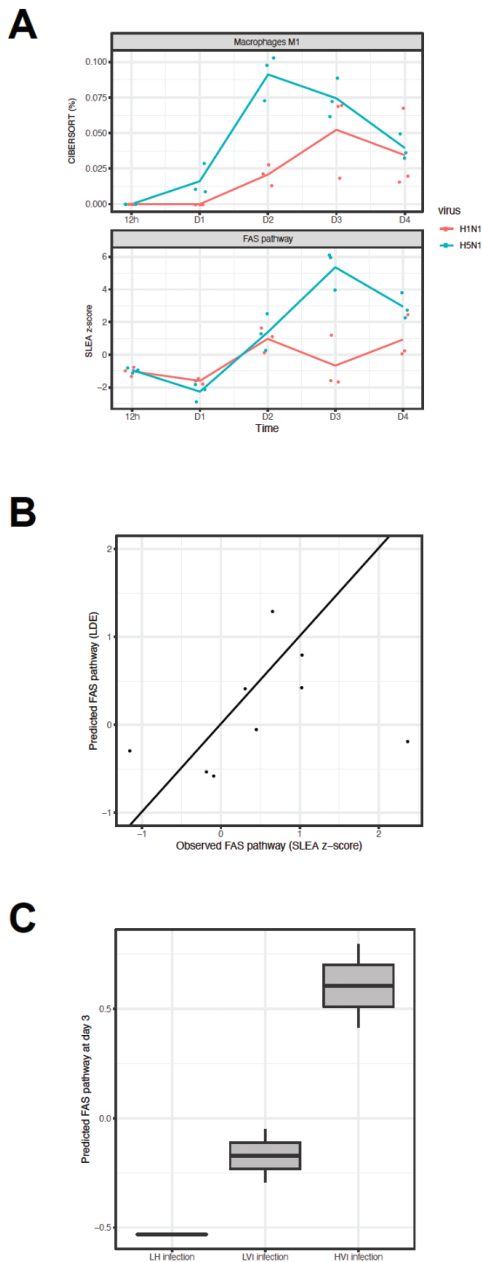

548  
549 **Figure S3. FAS pathway activation by M1 macrophages**

550 (A) Inferred frequency of M1 macrophages (upper panel) and FAS pathway activation (lower panel) as a  
551 function of time. M1 macrophages recruitment was maximal two days following infection with H5N1 while  
552 FAS pathway was maximum activation was 1 day later (day three following infection with H5N1). (B)  
553 Mathematical modeling of FAS pathway at day d, was expressed as a linear function of FAS pathway  
554 activation at day d-1 and M1 macrophage frequency at day-1. The resulting model was confirmed on a  
555 publicly available set of transcriptomic data of mice infected with mock (LH), low virulent H3N2 (LVI) and  
556 highly virulent H3N2 virus (HVI). The activation of FAS pathway predicted by the mathematical model (y-  
557 axis) is presented as a function of the observed activation of FAS pathway (x-axis). The resulting Spearman  
558 correlation was 0.617 and a t-test p-value of 0.0857. (C) Boxplot of the activation of FAS pathway predicted  
559 by the mathematical model as a function of H3N2 virulence.

560  
561

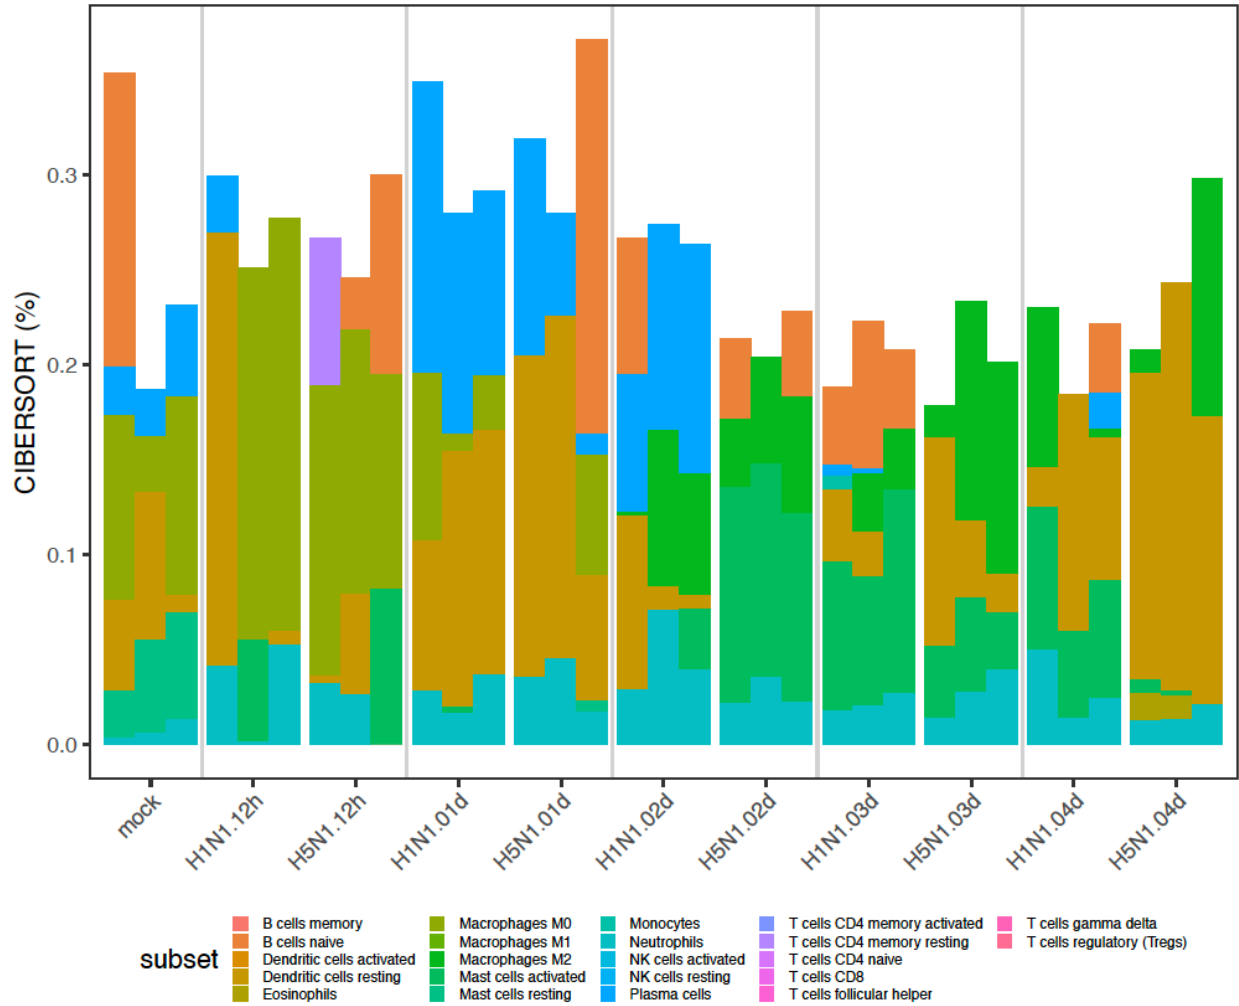

562  
563  
564  
565  
566  
567  
568

**Figure S2 Cell subset frequencies in mice lung following influenza infections**

Barplot of the relative frequencies of cell subsets inferred using CIBERSORT on the transcriptomic data collected after infection with H1N1, H5N1 or mock. The height of each bar is proportional with the inferred frequency of a subsets (color) in each triplicated samples (bars).

## 569 **Materials and Methods**

### 570 *Mice*

571 Animal studies were approved by the Institutional Animal Care and Use Committee of Icahn School of  
572 Medicine at Mount Sinai. C57BL/6J *Irfar1*<sup>-/-</sup> (24), *Stat2*<sup>-/-</sup> (84), and *Mx1*<sup>gfp</sup> (paper 1) mice have been  
573 previously described. *Irfnb*<sup>mob</sup>, *Ccr2*<sup>-/-</sup>, and *Fas*<sup>gld</sup> mice on the C57BL/6J background were purchased from  
574 Jackson. For mixed bone marrow chimeras 6-week old B6.SJL-Ptprca<sup>a</sup> Pepcb<sup>b</sup>/BoyJ (CD45.1) female mice  
575 were irradiated with 2 doses of 600 rads and injected with a 50:50 mix of WT (CD45.1) and *Stat2*<sup>-/-</sup> (CD45.2)  
576 bone marrow.

577

### 578 *Lung isolations and flow cytometry*

579 Lungs were digested for 40 min in 1 mg/ml collagenase type 4 (Worthington) 5% FBS in DMEM. Cells were  
580 then filtered through a 0.2 µm cell strainer and RBCs were lysed. Cells were suspended in 3% FBS 2 mM  
581 EDTA in PBS and staining was performed in the presence of 2% NRS, 2% Fc block (BD), and fixable  
582 viability dye eFluor 450 (ebiosciences). Cells were stained with the following antibodies from BD: Ly6C-  
583 PerCP-Cy5.5 (AL-21), CD11b-PE (M1/70), Ly6G-V450 (1A8), CD11c-V450 or PE-Cy7 (HL3), CD45.1-FITC  
584 (A20), CD45.2-PE-CF594 (104), the following antibodies from eBiosciences: MHC Class II (I-A/I-E) e450  
585 (M5/114.15.2), FasL-APC (MFL3), and from R&D: CCR2-APC (475301). Influenza M2 (E10) (85) was  
586 conjugated to Alexa 647. Cells were fixed with 2% formaldehyde after staining and analyzed on an LSRII  
587 after gating for FSC/SSC, singlets, and live cells.

588

### 589 *Infections and chemokine treatment*

590 Mice were infected with the following viruses at the doses indicated in 20 µl PBS: A/PR/8/34 (H1N1) (PR8),  
591 A/Viet Nam/1203/04 (H5N1) lacking the multibasic cleavage site (HALo)(39). Viral titer was determined by  
592 plaque assay on MDCK cells. Mice were injected IV with 500 ng of CCL7 (47) and blood was harvested 30  
593 min later in EDTA, RBCs were lysed and cells were analyzed by flow cytometry.

594

### 595 *qRT-PCR*

596 Total RNA was extracted from collagenase-digested lung using using EZNA total RNA kit and RNase-free  
597 DNase (Omega). RNA was reverse-transcribed using Maxima Reverse Transcriptase and oligo-dT  
598 (Thermo). Quantitative RT-PCR was performed on cDNA using LightCycler 480 SYBR Green I Master Mix  
599 (Roche) and the primers *tgaccgcgtaaactgaagctaat-Ccl2F*, *tcacagtccgagtcacactagttcac-Ccl2R*,  
600 *ggatctctgccacgcttctg-Ccl7F*, *tcttctgtagctcttgagattcctc-Ccl7R*, *cacagccctctccatcaacta-Irfnb1F*,  
601 *catttccgaatgttcgtcct-Irfnb1R*, *gtaaccggtgaacccatt-18SF*, and *ccatccaatcggtagtagcg-18SR* on a LightCycler  
602 480 II and expressed as 2<sup>-ΔΔCt</sup> relative to 18S.

603

### 604 *RNA-Seq analysis*

605 Mouse lungs were homogenized in liquid nitrogen. 1 ml Trizol was added per 50-100 mg of tissue and the  
606 homogenate was incubated at room temperature for 5 minutes. 200 µl chloroform were added per ml of  
607 Trizol, shaken vigorously for 15-30 seconds and incubated at room temperature for 15 minutes. Samples  
608 were centrifuged for 15 minutes at 4°C and 12,000 rcf. The aqueous phase was carefully collected in a  
609 separate tube. 500 µl isopropanol was added per 1 ml Trizol, inverted to mix and incubated at room  
610 temperature for 5-10 minutes. Samples were transferred to Qiagen RNeasy Spin Columns and RNA was  
611 isolated according to the manufacturer's instructions.

612 Libraries were constructed using the Illumina TruSeq Stranded Total RNA Library Prep Kit. Pair-end  
613 sequencing of 126 base pair reads was used. Raw reads were trimmed using Trimmomatic (version 0.36)  
614 using default value for pair-end sequencing. The trimmed reads were then aligned to the mouse genome  
615 (build GRCm38.91) using the STAR aligner (version 2.5.3a). Aligned reads were then counted using HTSeq  
616 (version 0.9.1). Differential expressed genes between H5N1- and H1N1-infected mice was determined by  
617 fitting a generalized linear model with gene counts as dependent variable and the virus strain (H5N1 or  
618 H1N1) as independent variable. A likelihood ratio test and Benjamini-Hoshberg correction, as implemented  
619 in the R package edgeR, was used to assess the statistical significance of the differential expression.

620 Gene Set Enrichment Analysis (GSEA) was used to assess the significance of MSigDB (version 6.2), blood-  
621 cell markers (PMID: 21743478, 28263321) and macrophages signatures (PMID: 28694385, 28421818),  
622 cytokines/chemokines (<https://www.immport.org/resources/cytokineRegistry>) and interferome (version 2)  
623 genesets. Gene were ordered from the most induced after H5N1 infection to the gene the most repressed  
624 by H5N1 infection compared to H1N1 using edgeR p-values (i.e. -log<sub>10</sub>(p) x sign(logFC)). Default

625 parameters were used except the maximum genesets size was increased to 2000 genes and fixed seed  
626 for the permutation test equal 101. Cibersort (version 1.03) was used to infer cell subsets frequency based  
627 on RNA-Seq data.

628 CIBERSORT (version 1.03) was used to infer immune cell subset frequencies using default parameters.

629

### 630 *Microarray analysis*

631 The human blood dataset of healthy individuals challenged with H1N1 was previously described in [PMID:  
632 30356117]. Briefly, two independent microarray datasets (DEE3 H1N1, DEE4X H1N1) were combined.  
633 Each of these studies are from human viral exposure trials where healthy volunteers were followed for 7–9  
634 days following controlled nasal exposure to H1N1 virus. Subjects enrolled into these viral exposure  
635 experiments had to meet several inclusion and exclusion criteria. Among them was an evaluation of pre-  
636 existing neutralizing antibodies to the viral strain. Any subject with pre-existing antibodies to the viral strain  
637 was excluded. All subjects exposed to H1N1 influenza received oseltamivir 5 days post-exposure. All  
638 subjects provided written consents, and each of the seven trials was reviewed and approved by the  
639 appropriate governing IRB. Symptom data and nasal lavage samples were collected from each subject on  
640 a repeated basis over the course of 7–9 days. Viral infection was quantified by measuring release of viral  
641 particles from nasal passages (viral shedding), as assessed from nasal lavage samples via qualitative viral  
642 culture and/or quantitative influenza RT-PCR. Symptom data were collected through self-report on a  
643 repeated basis. Symptoms were quantified using a modified Jackson score, which assessed the severity  
644 of eight upper respiratory symptoms (runny nose, cough, headache, malaise, myalgia, sneeze, sore throat,  
645 and stuffy nose) rated 0–4, with 4 being most severe. Scores were integrated daily over 5-day windows.  
646 Blood was collected and gene expression of peripheral blood was performed 1 day (24–30 h) prior to  
647 exposure, immediately prior to exposure, and at regular intervals following exposure. These peripheral  
648 blood samples were gene expression profiled on the Affy Human Genome U133A 2.0 array. Only raw (CEL  
649 files) gene expression data that pass QC metrics including those for RNA degradation, scale factors,  
650 percent genes present,  $\beta$ -actin 3' to 5' ratio and GAPDH 3' to 5' ratio in the Affy Bioconductor package were  
651 used for downstream analysis. Normalization via RMA was performed on all expression data across all  
652 timepoints. The primary endpoint used for differential expression analysis was the symptom score as  
653 continuous variable indicating the log of the maximum 5-day integrated symptom score +1. Linear  
654 regression using the R package LIMMA was used to identify genes correlated to the symptom score. GSEA  
655 on the gene list ranked by the LIMMA t-static and using the blood-cell markers (PMID: 21743478,  
656 28263321) as reference database was used to identify immune cell subsets correlated to the symptom  
657 score.

658

### 659 *Proteomics*

660 Protein abundance in the lung homogenates was measured using amine-reactive isobaric tags in an  
661 untargeted run. Briefly, after lysis and protein digestion, peptides from the lung homogenates were labeled  
662 with a Tandem Mass Tag (TMT; Thermo Fisher) and mixed in equal proportions. These mixed samples  
663 were analyzed by LC-MS on a Thermo Orbitrap Fusion with extended run times to ensure deep coverage.  
664 All samples were prepared in biological triplicate and run in technical duplicate to increase sequencing  
665 depth. Peptide searches using MaxQuant and statistical testing using MSstatTMT were performed. Fisher  
666 exact test was used to assess enrichment of cell subset markers among proteins differentially expressed  
667 between H5N1- and H1N1-infected mice.

668

### 669 *Statistical analysis*

670 A Wilcoxon rank-sum test was used to compare levels between two groups. A Spearman correlation and a  
671 Student t-test was used to assess the correlation between two continuous variables.

672

### 673 **Author contributions**

674 MBU conceived the project, performed the experiments, generated the figures and wrote the manuscript.  
675 AGS supervised the work, provided funding, and critically reviewed the manuscript.

676

### 677 **Acknowledgements**

678 We thank Christian Schindler for originally providing the *Stat2*<sup>-/-</sup> mice. We are grateful to Richard Cadagan  
679 and Osman Lizardo for excellent technical assistance. This work was partially supported by CRIP (Center

680 for Research on Influenza Pathogenesis), an NIAID funded Center of Excellence for Influenza Research  
681 and Surveillance (CEIRS, contract # HHSN272201400008C to AG-S, RA and MBU).

682

#### 683 DATA AND SOFTWARE AVAILABILITY

##### 684 *Data availability*

685 RNA-Seq have been deposited in the NCBI's Gene Expression Omnibus with the accession number  
686 GSE98527. Proteomics data have been deposited in MassIVE and will be made available with publication  
687 of the article.

688

##### 689 *Code availability*

690 All the source code used to generate the figures part of this manuscript is available at  
691 "<https://github.com/sekalylab/fluomics.lung>". The authors declare that all other data supporting the findings  
692 of this study are available from the authors upon request.

693 **References**

- 694 1. Tsou, C. L., W. Peters, Y. Si, S. Slaymaker, A. M. Aslanian, S. P. Weisberg, M. Mack, and  
695 I. F. Charo. 2007. Critical roles for CCR2 and MCP-3 in monocyte mobilization from  
696 bone marrow and recruitment to inflammatory sites. *J Clin Invest* 117: 902-909.
- 697 2. Jia, T., N. V. Serbina, K. Brandl, M. X. Zhong, I. M. Leiner, I. F. Charo, and E. G. Pamer.  
698 2008. Additive roles for MCP-1 and MCP-3 in CCR2-mediated recruitment of  
699 inflammatory monocytes during *Listeria monocytogenes* infection. *J Immunol* 180:  
700 6846-6853.
- 701 3. Serbina, N. V., and E. G. Pamer. 2006. Monocyte emigration from bone marrow during  
702 bacterial infection requires signals mediated by chemokine receptor CCR2. *Nat*  
703 *Immunol* 7: 311-317.
- 704 4. Sunderkotter, C., T. Nikolic, M. J. Dillon, N. Van Rooijen, M. Stehling, D. A. Drevets, and  
705 P. J. Leenen. 2004. Subpopulations of mouse blood monocytes differ in maturation  
706 stage and inflammatory response. *J Immunol* 172: 4410-4417.
- 707 5. Varol, C., L. Landsman, D. K. Fogg, L. Greenshtein, B. Gildor, R. Margalit, V. Kalchenko,  
708 F. Geissmann, and S. Jung. 2007. Monocytes give rise to mucosal, but not splenic,  
709 conventional dendritic cells. *J Exp Med* 204: 171-180.
- 710 6. MacDonald, K. P., J. S. Palmer, S. Cronau, E. Seppanen, S. Olver, N. C. Raffelt, R. Kuns, A.  
711 R. Pettit, A. Clouston, B. Wainwright, D. Branstetter, J. Smith, R. J. Paxton, D. P. Cerretti,  
712 L. Bonham, G. R. Hill, and D. A. Hume. 2010. An antibody against the colony-  
713 stimulating factor 1 receptor depletes the resident subset of monocytes and tissue-  
714 and tumor-associated macrophages but does not inhibit inflammation. *Blood* 116:  
715 3955-3963.
- 716 7. Yona, S., K. W. Kim, Y. Wolf, A. Mildner, D. Varol, M. Breker, D. Strauss-Ayali, S. Viukov,  
717 M. Guilliams, A. Misharin, D. A. Hume, H. Perlman, B. Malissen, E. Zelzer, and S. Jung.  
718 2013. Fate mapping reveals origins and dynamics of monocytes and tissue  
719 macrophages under homeostasis. *Immunity* 38: 79-91.
- 720 8. Alder, J. K., R. W. Georgantas, 3rd, R. L. Hildreth, I. M. Kaplan, S. Morisot, X. Yu, M.  
721 McDevitt, and C. I. Civin. 2008. Kruppel-like factor 4 is essential for inflammatory  
722 monocyte differentiation in vivo. *J Immunol* 180: 5645-5652.
- 723 9. Kurotaki, D., N. Osato, A. Nishiyama, M. Yamamoto, T. Ban, H. Sato, J. Nakabayashi, M.  
724 Umehara, N. Miyake, N. Matsumoto, M. Nakazawa, K. Ozato, and T. Tamura. 2013.  
725 Essential role of the IRF8-KLF4 transcription factor cascade in murine monocyte  
726 differentiation. *Blood* 121: 1839-1849.
- 727 10. Auffray, C., D. Fogg, M. Garfa, G. Elain, O. Join-Lambert, S. Kayal, S. Sarnacki, A. Cumano,  
728 G. Lauvau, and F. Geissmann. 2007. Monitoring of blood vessels and tissues by a  
729 population of monocytes with patrolling behavior. *Science* 317: 666-670.
- 730 11. Nahrendorf, M., F. K. Swirski, E. Aikawa, L. Stangenberg, T. Wurdinger, J. L. Figueiredo,  
731 P. Libby, R. Weissleder, and M. J. Pittet. 2007. The healing myocardium sequentially  
732 mobilizes two monocyte subsets with divergent and complementary functions. *J Exp*  
733 *Med* 204: 3037-3047.
- 734 12. Shechter, R., O. Miller, G. Yovel, N. Rosenzweig, A. London, J. Ruckh, K. W. Kim, E. Klein,  
735 V. Kalchenko, P. Bendel, S. A. Lira, S. Jung, and M. Schwartz. 2013. Recruitment of  
736 beneficial M2 macrophages to injured spinal cord is orchestrated by remote brain  
737 choroid plexus. *Immunity* 38: 555-569.

- 738 13. Segura, E., and S. Amigorena. 2013. Inflammatory dendritic cells in mice and humans.  
739 *Trends Immunol* 34: 440-445.
- 740 14. Xiong, H., and E. G. Pamer. 2015. Monocytes and infection: modulator, messenger and  
741 effector. *Immunobiology* 220: 210-214.
- 742 15. Duan, M., M. L. Hibbs, and W. Chen. 2016. The contributions of lung macrophage and  
743 monocyte heterogeneity to influenza pathogenesis. *Immunol Cell Biol*.
- 744 16. Guilliams, M., F. Ginhoux, C. Jakubzick, S. H. Naik, N. Onai, B. U. Schraml, E. Segura, R.  
745 Tussiwand, and S. Yona. 2014. Dendritic cells, monocytes and macrophages: a unified  
746 nomenclature based on ontogeny. *Nat Rev Immunol* 14: 571-578.
- 747 17. Channappanavar, R., A. R. Fehr, R. Vijay, M. Mack, J. Zhao, D. K. Meyerholz, and S.  
748 Perlman. 2016. Dysregulated Type I Interferon and Inflammatory Monocyte-  
749 Macrophage Responses Cause Lethal Pneumonia in SARS-CoV-Infected Mice. *Cell Host*  
750 *Microbe* 19: 181-193.
- 751 18. Gralinski, L. E., and R. S. Baric. 2015. Molecular pathology of emerging coronavirus  
752 infections. *J Pathol* 235: 185-195.
- 753 19. Israelow, B., E. Song, T. Mao, P. Lu, A. Meir, F. Liu, M. M. Alfajaro, J. Wei, H. Dong, R. J.  
754 Homer, A. Ring, C. B. Wilen, and A. Iwasaki. 2020. Mouse model of SARS-CoV-2 reveals  
755 inflammatory role of type I interferon signaling. *J Exp Med* 217.
- 756 20. Dawson, T. C., M. A. Beck, W. A. Kuziel, F. Henderson, and N. Maeda. 2000. Contrasting  
757 effects of CCR5 and CCR2 deficiency in the pulmonary inflammatory response to  
758 influenza A virus. *Am J Pathol* 156: 1951-1959.
- 759 21. Aldridge, J. R., Jr., C. E. Moseley, D. A. Boltz, N. J. Negovetich, C. Reynolds, J. Franks, S.  
760 A. Brown, P. C. Doherty, R. G. Webster, and P. G. Thomas. 2009. TNF/iNOS-producing  
761 dendritic cells are the necessary evil of lethal influenza virus infection. *Proc Natl Acad*  
762 *Sci U S A* 106: 5306-5311.
- 763 22. Lin, S. J., M. Lo, R. L. Kuo, S. R. Shih, D. M. Ojcius, J. Lu, C. K. Lee, H. C. Chen, M. Y. Lin, C.  
764 M. Leu, C. N. Lin, and C. H. Tsai. 2014. The pathological effects of CCR2+ inflammatory  
765 monocytes are amplified by an IFNAR1-triggered chemokine feedback loop in highly  
766 pathogenic influenza infection. *J Biomed Sci* 21: 99.
- 767 23. Herold, S., M. Steinmueller, W. von Wulffen, L. Cakarova, R. Pinto, S. Pleschka, M. Mack,  
768 W. A. Kuziel, N. Corazza, T. Brunner, W. Seeger, and J. Lohmeyer. 2008. Lung epithelial  
769 apoptosis in influenza virus pneumonia: the role of macrophage-expressed TNF-  
770 related apoptosis-inducing ligand. *J Exp Med* 205: 3065-3077.
- 771 24. Muller, U., U. Steinhoff, L. F. Reis, S. Hemmi, J. Pavlovic, R. M. Zinkernagel, and M. Aguet.  
772 1994. Functional role of type I and type II interferons in antiviral defense. *Science* 264:  
773 1918-1921.
- 774 25. McNab, F., K. Mayer-Barber, A. Sher, A. Wack, and A. O'Garra. 2015. Type I interferons  
775 in infectious disease. *Nat Rev Immunol* 15: 87-103.
- 776 26. Davidson, S., S. Crotta, T. M. McCabe, and A. Wack. 2014. Pathogenic potential of  
777 interferon alpha in acute influenza infection. *Nat Commun* 5: 3864.
- 778 27. Frieman, M. B., J. Chen, T. E. Morrison, A. Whitmore, W. Funkhouser, J. M. Ward, E. W.  
779 Lamirande, A. Roberts, M. Heise, K. Subbarao, and R. S. Baric. 2010. SARS-CoV  
780 pathogenesis is regulated by a STAT1 dependent but a type I, II and III interferon  
781 receptor independent mechanism. *PLoS Pathog* 6: e1000849.
- 782 28. Mahlakoiv, T., D. Ritz, M. Mordstein, M. L. DeDiego, L. Enjuanes, M. A. Muller, C.  
783 Drosten, and P. Staeheli. 2012. Combined action of type I and type III interferon



- 784 restricts initial replication of severe acute respiratory syndrome coronavirus in the  
785 lung but fails to inhibit systemic virus spread. *J Gen Virol* 93: 2601-2605.
- 786 29. Staeheli, P., R. Grob, E. Meier, J. G. Sutcliffe, and O. Haller. 1988. Influenza virus-  
787 susceptible mice carry Mx genes with a large deletion or a nonsense mutation. *Mol*  
788 *Cell Biol* 8: 4518-4523.
- 789 30. Mordstein, M., G. Kochs, L. Dumoutier, J. C. Renauld, S. R. Paludan, K. Klucher, and P.  
790 Staeheli. 2008. Interferon-lambda contributes to innate immunity of mice against  
791 influenza A virus but not against hepatotropic viruses. *PLoS Pathog* 4: e1000151.
- 792 31. Steinhauer, D. A. 1999. Role of hemagglutinin cleavage for the pathogenicity of  
793 influenza virus. *Virology* 258: 1-20.
- 794 32. Garcia-Sastre, A., R. K. Durbin, H. Zheng, P. Palese, R. Gertner, D. E. Levy, and J. E.  
795 Durbin. 1998. The role of interferon in influenza virus tissue tropism. *J Virol* 72: 8550-  
796 8558.
- 797 33. Szretter, K. J., S. Gangappa, J. A. Belser, H. Zeng, H. Chen, Y. Matsuoka, S. Sambhara, D.  
798 E. Swayne, T. M. Tumpey, and J. M. Katz. 2009. Early control of H5N1 influenza virus  
799 replication by the type I interferon response in mice. *J Virol* 83: 5825-5834.
- 800 34. Salomon, R., E. Hoffmann, and R. G. Webster. 2007. Inhibition of the cytokine response  
801 does not protect against lethal H5N1 influenza infection. *Proc Natl Acad Sci U S A* 104:  
802 12479-12481.
- 803 35. Uccellini, M. B., and A. Garcia-Sastre. 2018. ISRE-Reporter Mouse Reveals High Basal  
804 and Induced Type I IFN Responses in Inflammatory Monocytes. *Cell Rep* 25: 2784-  
805 2796 e2783.
- 806 36. Seo, S. U., H. J. Kwon, H. J. Ko, Y. H. Byun, B. L. Seong, S. Uematsu, S. Akira, and M. N.  
807 Kweon. 2011. Type I interferon signaling regulates Ly6C(hi) monocytes and  
808 neutrophils during acute viral pneumonia in mice. *PLoS Pathog* 7: e1001304.
- 809 37. Cole, S. L., J. Dunning, W. L. Kok, K. H. Benam, A. Benlahrech, E. Repapi, F. O. Martinez,  
810 L. Drumright, T. J. Powell, M. Bennett, R. Elderfield, C. Thomas, M. investigators, T.  
811 Dong, J. McCauley, F. Y. Liew, S. Taylor, M. Zambon, W. Barclay, V. Cerundolo, P. J.  
812 Openshaw, A. J. McMichael, and L. P. Ho. 2017. M1-like monocytes are a major  
813 immunological determinant of severity in previously healthy adults with life-  
814 threatening influenza. *JCI Insight* 2: e91868.
- 815 38. Ellis, G. T., S. Davidson, S. Crotta, N. Branzk, V. Papayannopoulos, and A. Wack. 2015.  
816 TRAIL+ monocytes and monocyte-related cells cause lung damage and thereby  
817 increase susceptibility to influenza-Streptococcus pneumoniae coinfection. *EMBO*  
818 *Rep* 16: 1203-1218.
- 819 39. Steel, J., A. C. Lowen, L. Pena, M. Angel, A. Solorzano, R. Albrecht, D. R. Perez, A. Garcia-  
820 Sastre, and P. Palese. 2009. Live attenuated influenza viruses containing NS1  
821 truncations as vaccine candidates against H5N1 highly pathogenic avian influenza. *J*  
822 *Virol* 83: 1742-1753.
- 823 40. Nakaya, H. I., J. Wrammert, E. K. Lee, L. Racioppi, S. Marie-Kunze, W. N. Haining, A. R.  
824 Means, S. P. Kasturi, N. Khan, G. M. Li, M. McCausland, V. Kanchan, K. E. Kokko, S. Li, R.  
825 Elbein, A. K. Mehta, A. Aderem, K. Subbarao, R. Ahmed, and B. Pulendran. 2011.  
826 Systems biology of vaccination for seasonal influenza in humans. *Nat Immunol* 12:  
827 786-795.
- 828 41. Rieckmann, J. C., R. Geiger, D. Hornburg, T. Wolf, K. Kveler, D. Jarrossay, F. Sallusto, S.  
829 S. Shen-Orr, A. Lanzavecchia, M. Mann, and F. Meissner. 2017. Social network

- 830 architecture of human immune cells unveiled by quantitative proteomics. *Nat*  
831 *Immunol* 18: 583-593.
- 832 42. Peiris, J. S., C. Y. Cheung, C. Y. Leung, and J. M. Nicholls. 2009. Innate immune responses  
833 to influenza A H5N1: friend or foe? *Trends Immunol* 30: 574-584.
- 834 43. Gambotto, A., S. M. Barratt-Boyes, M. D. de Jong, G. Neumann, and Y. Kawaoka. 2008.  
835 Human infection with highly pathogenic H5N1 influenza virus. *Lancet* 371: 1464-  
836 1475.
- 837 44. Pang, I. K., P. S. Pillai, and A. Iwasaki. 2013. Efficient influenza A virus replication in  
838 the respiratory tract requires signals from TLR7 and RIG-I. *Proc Natl Acad Sci U S A*  
839 110: 13910-13915.
- 840 45. Fujikura, D., S. Chiba, D. Muramatsu, M. Kazumata, Y. Nakayama, T. Kawai, S. Akira, H.  
841 Kida, and T. Miyazaki. 2013. Type-I interferon is critical for FasL expression on lung  
842 cells to determine the severity of influenza. *PLoS One* 8: e55321.
- 843 46. Legge, K. L., and T. J. Braciale. 2005. Lymph node dendritic cells control CD8+ T cell  
844 responses through regulated FasL expression. *Immunity* 23: 649-659.
- 845 47. Bardina, S. V., D. Michlmayr, K. W. Hoffman, C. J. Obara, J. Sum, I. F. Charo, W. Lu, A. G.  
846 Pletnev, and J. K. Lim. 2015. Differential Roles of Chemokines CCL2 and CCL7 in  
847 Monocytosis and Leukocyte Migration during West Nile Virus Infection. *J Immunol*  
848 195: 4306-4318.
- 849 48. Goritzka, M., S. Makris, F. Kausar, L. R. Durant, C. Pereira, Y. Kumagai, F. J. Culley, M.  
850 Mack, S. Akira, and C. Johansson. 2015. Alveolar macrophage-derived type I  
851 interferons orchestrate innate immunity to RSV through recruitment of antiviral  
852 monocytes. *J Exp Med* 212: 699-714.
- 853 49. Perrone, L. A., J. K. Plowden, A. Garcia-Sastre, J. M. Katz, and T. M. Tumpey. 2008. H5N1  
854 and 1918 pandemic influenza virus infection results in early and excessive infiltration  
855 of macrophages and neutrophils in the lungs of mice. *PLoS Pathog* 4: e1000115.
- 856 50. Leung, Y. H., J. M. Nicholls, C. K. Ho, S. F. Sia, C. K. Mok, S. A. Valkenburg, P. Cheung, K.  
857 P. Hui, R. W. Chan, Y. Guan, S. Akira, and J. S. Peiris. 2014. Highly pathogenic avian  
858 influenza A H5N1 and pandemic H1N1 virus infections have different phenotypes in  
859 Toll-like receptor 3 knockout mice. *J Gen Virol* 95: 1870-1879.
- 860 51. van den Brand, J. M., B. L. Haagmans, D. van Riel, A. D. Osterhaus, and T. Kuiken. 2014.  
861 The pathology and pathogenesis of experimental severe acute respiratory syndrome  
862 and influenza in animal models. *J Comp Pathol* 151: 83-112.
- 863 52. Szretter, K. J., S. Gangappa, X. Lu, C. Smith, W. J. Shieh, S. R. Zaki, S. Sambhara, T. M.  
864 Tumpey, and J. M. Katz. 2007. Role of host cytokine responses in the pathogenesis of  
865 avian H5N1 influenza viruses in mice. *J Virol* 81: 2736-2744.
- 866 53. Coates, B. M., K. L. Staricha, C. M. Koch, Y. Cheng, D. K. Shumaker, G. R. S. Budinger, H.  
867 Perlman, A. V. Misharin, and K. M. Ridge. 2018. Inflammatory Monocytes Drive  
868 Influenza A Virus-Mediated Lung Injury in Juvenile Mice. *J Immunol* 200: 2391-2404.
- 869 54. Ghoneim, H. E., P. G. Thomas, and J. A. McCullers. 2013. Depletion of alveolar  
870 macrophages during influenza infection facilitates bacterial superinfections. *J*  
871 *Immunol* 191: 1250-1259.
- 872 55. Nakajima, N., N. Van Tin, Y. Sato, H. N. Thach, H. Katano, P. H. Diep, T. Kumasaka, N. T.  
873 Thuy, H. Hasegawa, L. T. San, S. Kawachi, N. T. Liem, K. Suzuki, and T. Sata. 2013.  
874 Pathological study of archival lung tissues from five fatal cases of avian H5N1  
875 influenza in Vietnam. *Mod Pathol* 26: 357-369.

- 876 56. Liao, M., Y. Liu, J. Yuan, Y. Wen, G. Xu, J. Zhao, L. Cheng, J. Li, X. Wang, F. Wang, L. Liu, I.  
877 Amit, S. Zhang, and Z. Zhang. 2020. Single-cell landscape of bronchoalveolar immune  
878 cells in patients with COVID-19. *Nat Med* 26: 842-844.
- 879 57. Lee, A. C. Y., K. K. W. To, H. Zhu, H. Chu, C. Li, W. W. N. Mak, A. J. X. Zhang, and K. Y. Yuen.  
880 2017. Avian influenza virus A H7N9 infects multiple mononuclear cell types in  
881 peripheral blood and induces dysregulated cytokine responses and apoptosis in  
882 infected monocytes. *J Gen Virol* 98: 922-934.
- 883 58. Cline, T. D., E. A. Karlsson, B. J. Seufzer, and S. Schultz-Cherry. 2013. The hemagglutinin  
884 protein of highly pathogenic H5N1 influenza viruses overcomes an early block in the  
885 replication cycle to promote productive replication in macrophages. *J Virol* 87: 1411-  
886 1419.
- 887 59. Barbalat, R., L. Lau, R. M. Locksley, and G. M. Barton. 2009. Toll-like receptor 2 on  
888 inflammatory monocytes induces type I interferon in response to viral but not  
889 bacterial ligands. *Nat Immunol* 10: 1200-1207.
- 890 60. Lee, P. Y., J. S. Weinstein, D. C. Nacionales, P. O. Scumpia, Y. Li, E. Butfiloski, N. van  
891 Rooijen, L. Moldawer, M. Satoh, and W. H. Reeves. 2008. A novel type I IFN-producing  
892 cell subset in murine lupus. *J Immunol* 180: 5101-5108.
- 893 61. Brincks, E. L., A. Katewa, T. A. Kucaba, T. S. Griffith, and K. L. Legge. 2008. CD8 T cells  
894 utilize TRAIL to control influenza virus infection. *J Immunol* 181: 4918-4925.
- 895 62. Wurzer, W. J., C. Ehrhardt, S. Pleschka, F. Berberich-Siebelt, T. Wolff, H. Walczak, O.  
896 Planz, and S. Ludwig. 2004. NF-kappaB-dependent induction of tumor necrosis  
897 factor-related apoptosis-inducing ligand (TRAIL) and Fas/FasL is crucial for efficient  
898 influenza virus propagation. *J Biol Chem* 279: 30931-30937.
- 899 63. Terry, R. L., D. R. Getts, C. Deffrasnes, C. van Vreden, I. L. Campbell, and N. J. King. 2012.  
900 Inflammatory monocytes and the pathogenesis of viral encephalitis. *J*  
901 *Neuroinflammation* 9: 270.
- 902 64. Stifter, S. A., N. Bhattacharyya, R. Pillay, M. Florido, J. A. Triccas, W. J. Britton, and C. G.  
903 Feng. 2016. Functional Interplay between Type I and II Interferons Is Essential to  
904 Limit Influenza A Virus-Induced Tissue Inflammation. *PLoS Pathog* 12: e1005378.
- 905 65. Thomas, G., R. Tacke, C. C. Hedrick, and R. N. Hanna. 2015. Nonclassical patrolling  
906 monocyte function in the vasculature. *Arterioscler Thromb Vasc Biol* 35: 1306-1316.
- 907 66. Hanna, R. N., L. M. Carlin, H. G. Hubbeling, D. Nackiewicz, A. M. Green, J. A. Punt, F.  
908 Geissmann, and C. C. Hedrick. 2011. The transcription factor NR4A1 (Nur77) controls  
909 bone marrow differentiation and the survival of Ly6C- monocytes. *Nat Immunol* 12:  
910 778-785.
- 911 67. Lee, P. Y., Y. Li, Y. Kumagai, Y. Xu, J. S. Weinstein, E. S. Kellner, D. C. Nacionales, E. J.  
912 Butfiloski, N. van Rooijen, S. Akira, E. S. Sobel, M. Satoh, and W. H. Reeves. 2009. Type  
913 I interferon modulates monocyte recruitment and maturation in chronic  
914 inflammation. *Am J Pathol* 175: 2023-2033.
- 915 68. Cros, J., N. Cagnard, K. Woollard, N. Patey, S. Y. Zhang, B. Senechal, A. Puel, S. K. Biswas,  
916 D. Moshous, C. Picard, J. P. Jais, D. D'Cruz, J. L. Casanova, C. Trouillet, and F. Geissmann.  
917 2010. Human CD14dim monocytes patrol and sense nucleic acids and viruses via  
918 TLR7 and TLR8 receptors. *Immunity* 33: 375-386.
- 919 69. Carlin, L. M., E. G. Stamatiades, C. Auffray, R. N. Hanna, L. Glover, G. Vizcay-Barrena, C.  
920 C. Hedrick, H. T. Cook, S. Diebold, and F. Geissmann. 2013. Nr4a1-dependent

- 921 Ly6C(low) monocytes monitor endothelial cells and orchestrate their disposal. *Cell*  
922 153: 362-375.
- 923 70. Peng, Y., Y. Latchman, and K. B. Elkon. 2009. Ly6C(low) monocytes differentiate into  
924 dendritic cells and cross-tolerize T cells through PDL-1. *J Immunol* 182: 2777-2785.
- 925 71. Hou, W., J. S. Gibbs, X. Lu, C. B. Brooke, D. Roy, R. L. Modlin, J. R. Bennink, and J. W.  
926 Yewdell. 2012. Viral infection triggers rapid differentiation of human blood  
927 monocytes into dendritic cells. *Blood* 119: 3128-3131.
- 928 72. Cao, W., A. K. Taylor, R. E. Biber, W. G. Davis, J. H. Kim, A. J. Reber, T. Chirkova, J. A. De  
929 La Cruz, A. Pandey, P. Ranjan, J. M. Katz, S. Gangappa, and S. Sambhara. 2012. Rapid  
930 differentiation of monocytes into type I IFN-producing myeloid dendritic cells as an  
931 antiviral strategy against influenza virus infection. *J Immunol* 189: 2257-2265.
- 932 73. Santini, S. M., C. Lapenta, M. Logozzi, S. Parlato, M. Spada, T. Di Pucchio, and F.  
933 Belardelli. 2000. Type I interferon as a powerful adjuvant for monocyte-derived  
934 dendritic cell development and activity in vitro and in Hu-PBL-SCID mice. *J Exp Med*  
935 191: 1777-1788.
- 936 74. Goudot, C., A. Coillard, A. C. Villani, P. Gueguen, A. Cros, S. Sarkizova, T. L. Tang-Huau,  
937 M. Bohec, S. Baulande, N. Hacohen, S. Amigorena, and E. Segura. 2017. Aryl  
938 Hydrocarbon Receptor Controls Monocyte Differentiation into Dendritic Cells versus  
939 Macrophages. *Immunity* 47: 582-596 e586.
- 940 75. Soudja, S. M., A. L. Ruiz, J. C. Marie, and G. Lauvau. 2012. Inflammatory monocytes  
941 activate memory CD8(+) T and innate NK lymphocytes independent of cognate  
942 antigen during microbial pathogen invasion. *Immunity* 37: 549-562.
- 943 76. Lee, A. J., B. Chen, M. V. Chew, N. G. Barra, M. M. Shenouda, T. Nham, N. van Rooijen, M.  
944 Jordana, K. L. Mossman, R. D. Schreiber, M. Mack, and A. A. Ashkar. 2017.  
945 Inflammatory monocytes require type I interferon receptor signaling to activate NK  
946 cells via IL-18 during a mucosal viral infection. *J Exp Med* 214: 1153-1167.
- 947 77. Dominguez-Andres, J., L. Feo-Lucas, M. Minguito de la Escalera, L. Gonzalez, M. Lopez-  
948 Bravo, and C. Ardavin. 2017. Inflammatory Ly6Chigh Monocytes Protect against  
949 Candidiasis through IL-15-Driven NK Cell/Neutrophil Activation. *Immunity* 46: 1059-  
950 1072 e1054.
- 951 78. Kumagai, Y., O. Takeuchi, H. Kato, H. Kumar, K. Matsui, E. Morii, K. Aozasa, T. Kawai,  
952 and S. Akira. 2007. Alveolar macrophages are the primary interferon-alpha producer  
953 in pulmonary infection with RNA viruses. *Immunity* 27: 240-252.
- 954 79. Fourati, S., A. Talla, M. Mahmoudian, J. G. Burkhart, R. Klen, R. Henao, T. Yu, Z. Aydin,  
955 K. Y. Yeung, M. E. Ahsen, R. Almugbel, S. Jahandideh, X. Liang, T. E. M. Nordling, M.  
956 Shiga, A. Stanescu, R. Vogel, D. C. C. Respiratory Viral, G. Pandey, C. Chiu, M. T. McClain,  
957 C. W. Woods, G. S. Ginsburg, L. L. Elo, E. L. Tsalik, L. M. Mangravite, and S. K. Sieberts.  
958 2018. A crowdsourced analysis to identify ab initio molecular signatures predictive  
959 of susceptibility to viral infection. *Nat Commun* 9: 4418.
- 960 80. Rusinova, I., S. Forster, S. Yu, A. Kannan, M. Masse, H. Cumming, R. Chapman, and P. J.  
961 Hertzog. 2013. Interferome v2.0: an updated database of annotated interferon-  
962 regulated genes. *Nucleic Acids Res* 41: D1040-1046.
- 963 81. Newman, A. M., C. L. Liu, M. R. Green, A. J. Gentles, W. Feng, Y. Xu, C. D. Hoang, M. Diehn,  
964 and A. A. Alizadeh. 2015. Robust enumeration of cell subsets from tissue expression  
965 profiles. *Nat Methods* 12: 453-457.

- 966 82. Misharin, A. V., L. Morales-Nebreda, P. A. Reyfman, C. M. Cuda, J. M. Walter, A. C.  
967 McQuattie-Pimentel, C. I. Chen, K. R. Anekalla, N. Joshi, K. J. N. Williams, H. Abdala-  
968 Valencia, T. J. Yacoub, M. Chi, S. Chiu, F. J. Gonzalez-Gonzalez, K. Gates, A. P. Lam, T. T.  
969 Nicholson, P. J. Homan, S. Soberanes, S. Dominguez, V. K. Morgan, R. Saber, A. Shaffer,  
970 M. Hinchcliff, S. A. Marshall, A. Bharat, S. Berdnikovs, S. M. Bhorade, E. T. Bartom, R. I.  
971 Morimoto, W. E. Balch, J. I. Sznajder, N. S. Chandel, G. M. Mutlu, M. Jain, C. J. Gottardi,  
972 B. D. Singer, K. M. Ridge, N. Bagheri, A. Shilatifard, G. R. S. Budinger, and H. Perlman.  
973 2017. Monocyte-derived alveolar macrophages drive lung fibrosis and persist in the  
974 lung over the life span. *J Exp Med* 214: 2387-2404.
- 975 83. Mould, K. J., L. Barthel, M. P. Mohning, S. M. Thomas, A. L. McCubbrey, T. Danhorn, S.  
976 M. Leach, T. E. Fingerlin, B. P. O'Connor, J. A. Reisz, A. D'Alessandro, D. L. Bratton, C. V.  
977 Jakubzick, and W. J. Janssen. 2017. Cell Origin Dictates Programming of Resident  
978 versus Recruited Macrophages during Acute Lung Injury. *Am J Respir Cell Mol Biol* 57:  
979 294-306.
- 980 84. Park, C., S. Li, E. Cha, and C. Schindler. 2000. Immune response in Stat2 knockout mice.  
981 *Immunity* 13: 795-804.
- 982 85. Bourmakina, S. V., and A. Garcia-Sastre. 2005. The morphology and composition of  
983 influenza A virus particles are not affected by low levels of M1 and M2 proteins in  
984 infected cells. *J Virol* 79: 7926-7932.  
985  
986
